1 **Title**

2 Deteriogenic flora of the Phlegraean Fields Archaeological Park: ecological analysis and management  
3 guidelines

4 **Authors**

5 Riccardo Motti<sup>1</sup>, Giuliano Bonanomi<sup>1</sup>, Adriano Stinca<sup>2</sup>

6  
7 **Affiliation**

8 <sup>1</sup>Department of Agricultural Sciences, University of Naples Federico II, Via Università 100, 80055  
9 Portici (Naples), Italy

10 <sup>2</sup> Department of Environmental, Biological and Pharmaceutical Sciences and Technologies,  
11 University of Campania Luigi Vanvitelli, Via Vivaldi 43, 81100 Caserta, Italy.

12  
13 **Corresponding author**

14 Corresponding author: Riccardo Motti Tel.: +39 081 2532014

15 E-mail address: [motti@unina.it](mailto:motti@unina.it)

16  
17 **Abstract**

18 Biodeterioration, the alteration caused by living organisms, on historical buildings and stone  
19 monuments is a well-known problem affecting two-thirds of the world's cultural heritage. The study  
20 of the flora growing on wall surface is of particular importance for the assessment of the risk of  
21 biodeterioration of stone artifacts by vascular plants, and for maintenance planning. In this study, we  
22 investigate how rock type, exposure and inclination of the wall affect the biodeteriogenic flora at 13  
23 sites of the Archaeological Park of the Phlegraean Fields located in the province of Naples, in  
24 southern Italy. For each site, we analysed randomly selected square areas with 2 x 2 m size,  
25 representing the different vegetation types in terms of vascular plant species cover. The total number  
26 of plant species recorded was 129, belonging to 43 families. *Erigeron sumatrensis*, *Sonchus*  
27 *tenerrimus*, and *Parietaria judaica* are the most commonly reported species, while *Capparis*  
28 *orientalis* is the species with the highest average coverage. Substrate type, exposure and surface  
29 inclination affect the floristic composition, with the average plant cover significantly higher on  
30 vertical surfaces and at western and southern exposure. All the main biodeteriogenic vascular plant  
31 species grow on more or less porous lythotype like yellow tufa, conglomerate and bricks. Finally,  
32 woody plants eradications methods are proposed by the tree cutting and local application of  
33 herbicides, to avoid stump and root sprouting and to minimize the dispersion of chemicals in the  
34 surrounding environment.

35

36 **Key words**

37 archaeological sites; biodeterioration; biological agents; bioreceptivity; conservation management;  
38 Hazard Index; higher plants; monument conservation

39

40 **1. Introduction**

41 In recent years, increasing attention has been paid to wall flora growing on archaeological and  
42 historical sites in the Mediterranean basin (Krigas et al., 1999; Spampinato et al., 2005; Iatrous et al.,  
43 2007; Motti and Stinca, 2011; Bartoli et al., 2017; Cicinelli et al., 2018; Dahmani et al., 2018).  
44 Although plants can in some cases be considered a protective resource for monuments (Miller, 2012;  
45 Erder, et al., 2013), in most cases they pose a severe threat to their conservation (Caneva et al., 2003;  
46 Celesti-Grapow and Blasi, 2004; Tjellén et al., 2015; Minissale et al., 2015).

47 Walls can be considered an extreme environment for plant life in many respects. Segal (1969)  
48 was the first to show that wall habitats show ecological features comparable with rocks in natural  
49 environments and could be described as artificial, highly selective ecosystems (Ellenberg, 1996;  
50 Laníková and Lososová, 2009; Francis, 2011). ). Wall surfaces, particularly vertical sections, offer  
51 limited opportunities for root development, the accumulation of organic matter and mineral nutrients  
52 thus limiting edaphic development and, thereafter, plant establishment (Duchoslav, 2002; Francis,  
53 2011). Physical and environmental characteristics of walls determine their capacity to act as habitat,  
54 and control the possibility of plants to colonise such man-made ecosystems. The factors which most  
55 influence the capacity of walls to function as habitat for vascular plants are wall size, construction  
56 materials, inclination, exposure and wall age (Francis, 2011).

57 Higher plant colonisation of stone monuments also depends on local factors such as human  
58 disturbance, microclimate in terms of temperature and humidity, and interaction with other plants  
59 (Segal, 1969; Kumbaric et al., 2012; Ceschin et al., 2016). Establishment of plant communities on  
60 walls generally depends on the level of disintegration of building materials, with the presence of  
61 crevices, fractures and interstices that promote root development and plant growth. Nevertheless, also  
62 the technology of wall building affects the growth of plant species which are able to colonise such  
63 artificial habitats (Duchoslav, 2002; Francis, 2011). Moreover, the vegetation surrounding the  
64 investigated site affects the composition and diversity of flora growing on stone structures  
65 (Duchoslav, 2002).

66 The Phlegraean Fields Archaeological Park (henceforth PFAF) was established in 2016 and  
67 includes 25 sites from the Graeco-Roman period spread over an area of about 8,000 hectares. The 25  
68 archaeological sites include ancient settlements, villas, thermal baths, temples, amphitheatres and

69 tombs. The study sites are inserted in a complex landscape with several different habitats such as  
70 coastal and lake vegetation, Mediterranean scrubland, thermophilic and mesophilic woodland,  
71 grassland and low impact farmland (Motti and Ricciardi, 2008). Therefore, the investigated sites  
72 proved to be an interesting case study due to their great floristic richness, historical value and natural  
73 context. In the present study, we investigate the role of lithotype and microclimatic factors in terms  
74 of exposure and inclination of man-made structures in controlling the occurrence and distribution of  
75 vascular plants in stone monuments.

76 Given the above considerations, the specific aims of the present work were to analyse the  
77 vascular flora detriogens of the PFAF and assess the risk of structural biodeterioration. Such  
78 knowledge is essential for the purposes of preserving the cultural landscape and for choosing  
79 appropriate management practices to prevent and eradicate vascular plants so as to minimise  
80 biodeterioration.

81

## 82 **2. Materials and methods**

83

### 84 **2.1. Study sites**

85 The Phlegraean area includes an insular part with the islands of Procida, Vivara and Ischia and a  
86 continental area, known as the Phlegraean Fields (Fig. 1). The area as a whole presents a highly  
87 articulated geomorphological configuration. In a very small area, bounded by a long coastline with  
88 beaches and rocky headlands, numerous volcanic calderas are interspersed with small lakes and  
89 plains. The area draws its origin from the eruption of 35,000 years ago, when a huge alkali trachytic  
90 ignimbrite followed by the subsequent collapse of the ancient volcano called Archiflegreo was  
91 released (Rosi et al., 1983). This phenomenon has produced a volcanic system with a complex hilly  
92 landscape, within which each peak represents the relict of ancient volcanic edifices, craters or  
93 eruptions.

94 Human settlements in the Phlegraean area, and especially in Cumae, date back to the III  
95 millennium BC. Founded by the Greeks in the 8th century BC, Cumae and its territory assumed great  
96 political and economic importance that allowed an expansion of its sphere of influence with the  
97 foundation of Dicearchia, the current Pozzuoli (Lombardo and Frisone, 2006). The maximum  
98 splendour of the Phlegraean area coincides with the end of the Republican age, when it became the  
99 focal point for the cultural and economic elite from Rome, and the whole territory is dotted with  
100 villas, palaces and sumptuous bath complexes (Maiuri, 1958).

101 The fall of the Roman Empire was followed by the decline of this area with the ruin of man-  
102 made structures already damaged by bradyseism. For many centuries, agriculture and silvi-pastoral

103 activities were dominant, although much of the farmland and forest has been lost to extensive and  
104 chaotic urbanisation in recent decades (Motti et al., 2004).

105 The climate of the Phlegraean fields is influenced by both its geographical position close to the  
106 Tyrrhenian Sea and its low altitude, reaching its maximum height at Mt. Sant'Angelo alla Corbara  
107 (319 m a.s.l.). Average rainfall (863 mm) and temperature (17.0 °C) in the area are typical of a  
108 Mediterranean climate, with a hot dry period between June and August. The whole Phlegraean flora  
109 now comprises approximately 750 taxa (Motti and Ricciardi, 2005). In our study, the floristic survey  
110 concerned 13 of the 25 sites included in the PFAF (Fig. 1; Tab. 1). The remaining sites were not  
111 surveyed because they are underwater or currently inaccessible.

112

113

114 Fig. 1. Study site (A), and location of the 13 selected sites in the PFAF (B)

115

116 Tab. 1. The 13 study sites selected in the PFAF area, their abbreviations and number of surveys  
117 carried out at each site

118

119

120

## 121 **2.2. Data collection and analysis**

122 The field surveys were carried out from March to September 2018. Overall, we carried out 143  
123 vegetation surveys (Tab. 1). The number of surveys, having taken different types of substrate into  
124 account, was proportional to the size and plant cover of each site . In each survey, we analysed  
125 randomly selected 2 x 2 m sampling units to represent the different vegetation types in terms of plant  
126 cover and floristic diversity. For each sampling units the following data were supplied: site name,  
127 position (UTM coordinates), substrate, position (vertical or horizontal), exposure and floristic list  
128 with percentage cover for each species. The plant specimens were identified in the field except for  
129 dubious cases, which were later identified at the Laboratory of Applied Ecology of the Department  
130 of Agricultural Sciences of Portici, according to Pignatti (1982), Pignatti et al. (2017a; 2017b; 2018),  
131 and Tutin et al. (1964; 1980; 1993). The nomenclature follows the checklist of Italian vascular flora  
132 (Bartolucci et al., 2018; Galasso et al., 2018). Families are organised based on APG IV (2016) for  
133 angiosperms. To evaluate the hazard of deteriogenic species, for each taxon the hazard index (HI)  
134 was assigned according to Signorini (1995, 1996). Plant life form was classified according to  
135 Raunkiaer (1934), mostly verified by field observations. The chorotype was assigned according to

136 Pignatti et al. (2017a, 2017b, 2018). Herbarium specimens are deposited in the Herbarium Porticense  
137 (PORUN).

138

### 139 **3. Results and discussion**

140

#### 141 **3.1. Deteriogenic flora**

142 In all, 129 plant species were recorded (Tab. S1), belonging to 43 families, of which the most species-  
143 rich are the Asteraceae (25 taxa), followed by the Poaceae (18 taxa) and Fabaceae (16 taxa).

144 *Erigeron sumatrensis* (HI=2) is the most commonly reported species in the 143 samples (Fig.  
145 2), followed by *Sonchus tenerrimus* (HI=5), *Parietaria judaica* (HI=5) and *Dittrichia viscosa* subsp.  
146 *viscosa* (HI=5). Among the ten species with the maximum average cover, seven show woody habits,  
147 with a Hazard Index between 5 and 10. *Capparis orientalis* (HI=8) is the species with the highest  
148 average cover (Fig. 3) followed by *Dittrichia viscosa* subsp. *viscosa* (HI=5) and *Spartium junceum*  
149 (HI=8).

150

151

152 Fig. 2. List of the 12 most commonly recorded species in the 143 sampling units (number of  
153 records for each species).

154

155

156

157

158 Fig. 3. Cover of the 10 most abundant species in the 143 sampling units

159

160 The normal chorological spectrum (Fig. 4) revealed the prevalence of Mediterranean species  
161 (33.7%), of which the most representative are euri-Mediterranean (62.8%) vs. steno-Mediterranean  
162 (37.2%). Widely distributed species are well-represented (35.7%), of which alien species amount to  
163 30.4%. These data are similar to those of the floristic list of the whole Phlegraean Fields area (Motti  
164 and Ricciardi, 2005).

165 The archaeological sites of the PACS are located in a floristic context dominated by species  
166 associated with agricultural environments, as well as by woody species typical of Mediterranean  
167 tufaceous coastal hill ecosystems (Motti and Ricciardi, 2008). Our data indicate that the flora growing  
168 on stone structures partially reflects this kind of vegetation. Hence the floristic composition of the  
169 PACS is influenced by its proximity to natural areas (Duchoslav, 2002; Migliozi et al., 2010).

170

171

172 Fig. 4. Normal chorological spectrum of the flora of the Phlegraean Fields Archaeological Park  
173 (PFAF) compared with that of the flora of the whole area of the Phlegraean Fields (PF) (Motti and  
174 Ricciardi, 2005)

175

176 The life form spectrum (Fig. 5A) shows a prevalence of Therophytes (48.4%) and  
177 Hemicryptophytes (28.6%) at all study sites, but these life forms have no predominant cover (Fig.  
178 5B). Woody life forms (Phanerophytes and Chamaephytes), which include the most deteriogenic  
179 species, account for 22.2% of the total frequency and 60.3% of total cover. The relationship between  
180 therophytes and hemicryptophytes (T/H ratio: 1.7) is influenced by human disturbance, which  
181 promotes the spread of short-lived species (Motti and Stinca 2011), as well as by climate.

182

183

184

185

186 Fig. 5 Plant life-form spectrum of the vascular flora (A) and percentage cover of different plant life  
187 forms (B) in the 143 sampling units (T=Therophytes; P=Phanerophytes; H = Hemicryptophytes; Ch  
188 = Chamaephytes).

189

### 190 **3.2. Deteriogenic flora: the role of inclination, exposure and substrate type**

191 Wall inclination affects the amount of direct solar radiation reaching the substrate and, indirectly, air  
192 and soil temperatures (Wieser and Tausz, 2007). Previous studies reported that horizontal surfaces,  
193 which provide better growing conditions, usually host a higher plant cover compared to vertical walls  
194 (Caneva et al., 1992; Lisci et al., 2003; Ceschin et al., 2016; Motti and Bonanomi, 2018). Vertical  
195 walls are often considered to be like desert habitats with a high degree of aridity, and the stone  
196 surfaces exposed to direct sunlight can reach extremely high temperatures (Garty, 1990). In contrast  
197 with previous results, in our study sites the average plant cover (Fig. 6A) was significantly higher on  
198 vertical surfaces (Fig. 7A). As shown also by Duchoslav (2002), Therophytes were more common on  
199 horizontal surfaces, while Hemicryptophytes, Chamaephytes and Phanerophytes, the most  
200 biodeteriogenic life forms, grow rather on vertical surfaces (Fig. 7B). This could be explained by the  
201 greater ability of the latter life forms to absorb water from greater depths (Kumbaric et al., 2012;  
202 Caneva et al., 2009). Alternatively, the high frequency and cover of Therophytes on flat surfaces and  
203 the widespread occurrence of woody plants on vertical surfaces could be explained by the different

204 effort exerted for cleaning. Indeed, vertical surfaces are more difficult for workers to reach and are  
205 therefore subject to less intense and less frequent removal of vegetation.

206

207 Fig. 6. Percentage cover (A), and percentage cover of life forms (B) on horizontal (H) and vertical  
208 (V) surfaces in the study sites. Values are averages of the 143 sampling units.

209

210 Among the species with the highest hazard index ( $HI > 5$ ), *Ficus carica*, *Matthiola incana*,  
211 *Pistacia lentiscus*, *Capparis orientalis*, *Reichardia picroides*, *Rubus ulmifolius* and *Artemisia*  
212 *arborescens* show a higher abundance on vertical surfaces. By contrast, *Spartium junceum*, *Rhamnus*  
213 *alaternus* and *Reseda alba* are almost indifferent to surface inclination, while *Ailanthus altissima*  
214 grows almost exclusively over horizontal substrates (Fig. 7).

215

216

217 Fig. 7. Relative cover of the 11 species with the highest HI in relation to inclination (H= horizontal;  
218 V=vertical). Values are averages in the 143 sampling units.

219

220 In the Mediterranean climate context, with its long summer drought, exposure plays a major role in  
221 causing differentiation in biological colonisation (Caneva and Ceschin, 2009). At mid latitudes of the  
222 northern hemisphere, south-facing slopes receive more direct solar radiation and can be expected to  
223 be much warmer and drier than other exposures.

224 In the study area, plant cover was highest on western and eastern-exposed walls (Fig. 8A).  
225 Phanerophytes, which are woody plants that may reach a considerable size and have an extensive root  
226 system (Pacini and Signorini, 2009), were recorded mainly on western and eastern exposures (Fig.  
227 8B). By contrast, herbaceous species (hemicryptophytes and therophytes) grow preferentially on  
228 south-facing slopes. The southern slopes reproduce the general life strategies of plants found in the  
229 Mediterranean climatic area where drought-avoiding annuals predominate and herbaceous perennials,  
230 which die back to the ground surface during the summer drought, are also common (Mooney and  
231 Dunn, 1970). The woody species grow under less dry exposure (East and West) and are almost all  
232 evergreen trees and shrubs, which tolerate the less intense drought that occurs over such exposures.  
233 Moreover, as highlighted by Callaway (2007), stones can act as an inanimate “nurse” structure,  
234 promoting the establishment and growth of plants and acting as a temperature buffer. In this  
235 perspective, southerly exposure may be more favourable for plant growth due to the larger amount of  
236 solar radiation, especially during autumn and winter (Motti and Bonanomi, 2018).

237



238 Fig. 8. Plant cover (A, average of the 143 sampling units) and cover of different life forms (B) in  
239 relation to exposure

240

241 Natural stones are the main element of the archaeological heritage and are subject to  
242 biodeterioration: they are mostly located outdoors and the processes of deterioration affecting them  
243 are the same that play an essential role in pedogenesis (Pinna and Salvadori, 2009). Effusive  
244 magmatic rocks such as yellow tuff, piperno and basalt represent the most common stony substrates  
245 in the PFAF. Instead, the man-made structures mainly consist of the following materials: i) *opus*  
246 *reticulatum*, consisting of a sand and lime mortar mix into which diamond-shaped bricks of tuff were  
247 positioned (Wilson, 2006); ii) *opus latericium* walls, built with clay-fired bricks bonded with mortar.  
248 In both cases, the bricks constitute the external parts of the wall, while the inner section is filled with  
249 a conglomerate of mortar, tuff and lapillus (Talamo P., *in verbis*).

250

251 Fig. 9. Selected images of the most common substrates found in the PFAF (A=Yellow tuff; B= *Opus*  
252 *latericium*; C=*Opus reticulatum*; D=Basalt; E=Piperno; F=Conglomerate).

253

254 Other non-effusive stones can be found in the study area, including marble and vitreous mosaics.  
255 Since tuff and mortar have a relatively high porosity (Kumbaric et al., 2012), they allow higher water  
256 penetration and are more likely to retain moisture compared to other lithotypes. On the above basis,  
257 we could partially explain the differences in plant cover among different substrates (Fig. 10A), which  
258 reaches the highest values on yellow tuff followed by conglomerate, *opus latericium* and *opus*  
259 *reticulatum*.

260

261 Fig. 10. Plant cover (A) and growth habit cover (B) in relation to substrate. Values are averages  
262 from the 143 sampling units

263

264 As shown in Fig. 9B, the less porous lithotypes like marble, basalt and mosaic are mainly  
265 colonised by herbaceous species, while woody species grow preferentially on volcanic rocks and  
266 structures with a higher moisture content. We speculate that therophytes can adapt to hard and non-  
267 porous substrates because their vegetative period is limited to autumn and winter when water shortage  
268 is not a limiting factor. Instead, perennial plants require porous substrates that store water, thus  
269 allowing survival also during the summer drought.

270 All the main deteriogenic vascular plant species grow on more or less porous substrates (Fig.  
271 10): none of them thrive on marble, basalt or mosaics. Some species (e.g. *Rubus ulmifolius*, *Rhamnus*



272 *alaternus*) are quite indifferent to the lithotype, while others, such as *Ailanthus altissima*, *Spartium*  
273 *junceum*, *Matthiola incana* and *Artemisia arborescens*, preferentially grow on yellow tuff.

274

275

276 Fig. 11. Relative cover of the 11 species with the highest HI in relation to substrates. Values  
277 are averages of the 143 sampling units.

278

279 Plant growth on walls can be therefore interpreted as a dynamic process with weeds that may  
280 alter the physical conditions of the substrate in which they thrive (Fisher 1972), also through  
281 progressive disintegration of building materials. Biochemical deterioration results from assimilatory  
282 processes, where the organism uses the stone surface as a source of nutrition, and from dissimilatory  
283 processes, where the organism produces a variety of metabolites that react chemically with the stone  
284 surface (Mortland et al., 1956; Caneva and Altieri, 1988). Carbon dioxide, produced through roots  
285 respiration, changes into carbonic acid [H<sub>2</sub>CO<sub>3</sub>] in an aqueous environment. The carbonic acid reacts  
286 with calcium carbonate [CaCO<sub>3</sub>] and magnesium [MgCO<sub>3</sub>] insoluble present in several substrates,  
287 forming calcium bicarbonate [Ca(HCO<sub>3</sub>)<sub>2</sub>] and magnesium [Mg(HCO<sub>3</sub>)<sub>2</sub>] soluble (Mishra et al.,  
288 1995; Pinna and Salvadori, 2005).

289 Plants exploit and help to create microenvironments suitable for plant growth , (Allsopp et al.,  
290 2004).and pre-existing plant cover favours the establishment of other taxa, also protecting them  
291 against evaporation and regulating relative humidity (Segal, 1969). In this sense, the first plants that  
292 colonise the walls mainly have a herbaceous growth habit and could be considered pioneer species  
293 playing a key role in stone weathering: their strong fasciculate root system creates or widens crevices  
294 in which soil is formed, providing organic matter and nutrients that promote succession of typical  
295 vegetation for the biogeographic region concerned (Segal, 1969; Duchoslav, 2002).

296

### 297 **3.3. Plant deterioration and management guidelines**

298 The plant average cover for each site is shown in Fig. 12, from which it can be seen that sites  
299 like the Temple of Apollo, Flavian Amphitheatre, Baia Castle, the Sacellum and Piscina Mirabilis  
300 need urgent maintenance to eliminate the most deteriogen vascular plants so as to minimise the risk  
301 of severe structural damage. In the other sites of the complex, although the plant cover is lower,  
302 periodic assessment of case-by-case situations is required.

303

304

305 Fig. 12. Plant cover (%) in the 13 study sites

306

307 Weed control in archaeological sites is complex and costly since proper conservation of man-made  
308 structures, the environment and the natural landscape has to be taken into account. Current practice  
309 at PFAF sites to manage undesirable vegetation relies mainly on mowing by the use of brush-cutters.  
310 This practice is strongly discouraged by archaeologists as it can cause additional deterioration to  
311 walls. Moreover, many species, especially shrubs and trees, are not completely eliminated because  
312 only the above-ground portion is cut. In recent years alternative non-chemical methods for weed  
313 control, including flame weeding and soil solarization, have been proposed (Papafotiou et al., 2016;  
314 Papafotiou et al., 2010). These treatments are often more expensive than chemical weed control due  
315 to higher treatment frequency and greater energy consumption than chemical weed control, resulting  
316 in a lower cost/benefit ratio (Kempenaar et al., 2002). Selective use of herbicides is, in our opinion,  
317 the most efficient and least costly practice for controlling and eradicating woody vascular plants,  
318 especially on vertical surfaces.

319 In many woody plants (e.g. *Ailanthus altissima*, *Capparis orientalis*) manual cutting generally  
320 stimulates stump and root sprouting due to the loss of apical dominance, such that cutting must be  
321 followed by local herbicide treatment (Caneva et al., 1996; Burch and Zedaker, 2003). The techniques  
322 suggested for this purpose are tree cutting and local application of herbicide by injection or by  
323 painting, allowing the herbicide to translocate throughout the roots and/or rhizome of the plant  
324 (Mendes et al., 2017) while maintaining the integrity of the remaining plant community.

325 These techniques involve the application of chemicals (e.g. glyphosate, imazapyr) directly on  
326 the plant, with no dispersion in the surrounding environment and minimising product quantities. Stem  
327 injection consists in making a cut (or a hole by drilling) downward at an angle of ~45 degrees through  
328 the bark, 4 to 8 cm long, and then injecting a small amount of herbicide (DiTomaso and Kyser, 2007).  
329 The cut stump method, instead, involves cutting off the plant completely at its base using a chainsaw.  
330 The herbicide solution is then painted onto the exposed surface.

331 The choice of the most appropriate technique is made on the basis of the structural and  
332 physiological features of the species, age and size of the specimen, and the position of the plant in  
333 relation to the wall. According to Caneva et al. (2009), these practices should be followed by wall  
334 consolidation because, with the death of the living roots, collapses and structural damage could arise.

335

#### 336 **4. Conclusions**

337 Our data provided useful information for understanding the role of abiotic factors (substrate, position,  
338 exposure) in determining plant growth. The eradication methods proposed in the present paper  
339 constitute an example of a multidisciplinary approach to restoration practices, in which collaboration

340 between agronomists, archaeologists and masonry experts is desirable. The ultimate goal is to apply  
341 efficient techniques with no undesirable side effects on the substrate.

342

### 343 **Acknowledgements**

344 We are very grateful to Paolo Giulierini, Director of the PFAF, and the technical-administrative  
345 staff who shared knowledge with us and for their logistical support. The authors wish to thank  
346 Pierfrancesco Talamo, archaeologist at the PFAF, for information concerning man-made structures.  
347 Stefano Emrick collaborated in field research. Mark Walters revised the English language version.

348

349

350

### 351 **References**

352 Allsopp D, Seal KJ, Gaylarde CC. Introduction to biodeterioration, second ed. Cambridge University  
353 Press; 2004.

354 Bartolucci F, Peruzzi L, Galasso G, Albano A, Alessandrini A, Ardenghi NMG, et al. An updated  
355 checklist of the vascular flora native to Italy. *Plant Biosyst.* 2018;152(2):179-303.

356 Burch PL, Zedaker SM. Removing the invasive tree *Ailanthus altissima* and restoring natural cover.  
357 *Journal of Arboriculture.* 2003;29:18–24.

358 Callaway RM. Positive Interactions and Interdependence in Plant Communities. Springer, Dordrecht,  
359 NL; 2007.

360 Caneva G, Altieri A. Biochemical mechanisms of stone weathering induced by plant growth. In:  
361 Proceedings of the 6th international congress on deterioration and conservation of stone. Nicholas  
362 Copernicus University Press, Torun, Poland; 1988. p. 32-44.

363 Caneva G, Ceschin S. Ecology of biodeterioration. In: *Plant Biology for Cultural Heritage.*  
364 *Biodeterioration and Conservation.* 2009;35-58.

365 Caneva G, De Marco G, Dinelli A, Vinci M. The wall vegetation of the roman archaeological areas.  
366 *Science and technology for cultural heritage.* 1992;1:217-226.

367 Caneva G, Galotta G, Cancellieri L, Savo V. Tree roots and damages in the Jewish catacombs of Villa  
368 Torlonia (Roma). *J Cult Herit.* 2009;10(1):53-62.

369 Caneva G, Pacini A, Celesti-Grappow L, Ceschin S. The Colosseum's use and state of abandonment  
370 as analysed through its flora. *Int Biodeterior Biodegradation.* 2003;51:211–219.

371 Caneva G., Benelli F., Bartoli F., Cicinelli E. Safeguarding natural and cultural heritage on Etruscan  
372 tombs (La Banditaccia, Cerveteri, Italy). *Rendiconti Lincei. Scienze Fisiche e Naturali.*  
373 2018;29(4):891-907.

374 Celesti-Grappow L Blasi C. The Role of Alien and Native Weeds in the Deterioration of  
375 Archaeological Remains in Italy. *Weed Technology.* 2004;18(sp1), 1508-1514.

376 Ceschin S, Bartoli F, Salerno G, Zuccarello V, Caneva G Natural habitats of typical plants growing  
377 on ruins of Roman archaeological sites (Rome, Italy). *Plant Biosyst.* 2016;150(5):866-875.

- 378 Chase MW, Christenhusz MJM, Fay MF, Byng JW, et al. An update of the angiosperm phylogeny  
379 group classification for the orders and families of flowering plants: APG IV. *Bot J Linn Soc.*  
380 2016;181(1):1-20.
- 381 Cicinelli E, Salerno G, Caneva G, 2018. An assessment methodology to combine the preservation of  
382 biodiversity and cultural heritage: the San Vincenzo al Volturno historical site (Molise, Italy).  
383 *Biodivers Conserv.* 27(5):1073-1093.
- 384 Dahmani J, Benharbit M, Fassar M, Hajila R, Zidane L, Magri N., Belahbib N. Vascular plants census  
385 linked to the biodeterioration process of the Portuguese city of Mazagan in El Jadida,  
386 Morocco. *Journal of King Saud University-Science*; 2018.
- 387 DiTomaso JM., Kyser GB. Control of *Ailanthus altissima* using stem herbicide application  
388 techniques. *Arboric Urban For.* 2007;33(1):55.
- 389 Duchoslav M. Flora and vegetation of stony walls in East Bohemia (Czech Republic). *Preslia-Praha.*  
390 2002;74(1):1-26.
- 391 Ellenberg H. *Vegetation Mitteleuropas mit den Alpen in: Ökologischer, dynamischer und historischer*  
392 *Sicht Verlag. Eugen Ulmer, Stuttgart 5; 1996*
- 393 Erder E, Gürsan-Salzman A, Miller NF. A Conservation Management Plan for Gordion and its  
394 Environs Conservation and Management of Archaeological Sites. 2013;15(3-4):329–347.
- 395 Fisher GG. Weed damage to materials and structures. *International Biodeterioration Bulletin.*  
396 1972;8:101-103.
- 397 Francis RA. Wall ecology: A frontier for urban biodiversity and ecological engineering. *Prog Phys*  
398 *Geogr.* 2011;35(1):43-63.
- 399 Galasso G, Conti F, Peruzzi L, Ardenghi NMG, Banfi E, Celesti-Grapow, et al. An updated checklist  
400 of the vascular flora alien to Italy. *Plant Biosyst.* 2018;152(3):556-592.
- 401 Garty J. Influence of epilithic microorganisms on the surface temperature of building walls. *Can J*  
402 *Bot.* 1990. 68(6):1349-1353.
- 403 Iatrou G, Trigas P, Pettas N. The vascular flora of Akrokorinthos Castle and its surrounding area (NE  
404 Peloponnese, Greece). *Phytologia Balcanica.* 2007;13(1):83-93.
- 405 Kempenaar C, Spijke, JH., Vermeulen GD, Lotz LAP. Rational weed control on hard surfaces, Laar  
406 HHv, Proc 12th Eur Weed Res Soc (EWRS) Symposium, EWRS Wageningen, The Netherlands;  
407 2002. p 162–163.
- 408 Krigas N, Lagiou E, Hanlidou E, Kokkini S. The vascular flora of the Byzantine Walls of Thessaloniki  
409 (N Greece). *Willdenowia.* 1999;77-94.
- 410 Kumbaric A, Ceschin S, Zuccarello V, Caneva G. Main ecological parameters affecting the  
411 colonization of higher plants in the biodeterioration of stone embankments of Lungotevere (Rome).  
412 *Int Biodeterior Biodegrad.* 2012;72:31–41.
- 413 Laniková D, Lososová Z. Rocks and walls: natural versus secondary habitats *Folia Geobot.* 2009;44  
414 (3):263–280.
- 415 Lisci M, Monte M, Pacini E. Lichens and higher plants on stone: a review. *Int Biodeterior Biodegrad.*  
416 2003;51:1–17.
- 417 Lombardo M, Frisone F. Colonie di colonie: le fondazioni sub-coloniali greche tra colonizzazione e  
418 colonialismo. *Atti del Convegno Internazionale di studi (sezione "Tra sub-colonia ad epikia: il caso*  
419 *di Neapolis")*, Lecce 22-24 giugno 2006, Congedo Ed.,
- 420 Maiuri A. *I Campi Flegrei*, III ed.; 1958 Roma p. 19-61.

- 421 Mendes KF, Silveira RF., Inoue MH, Tornisielo VL. Procedures for Detection of Resistant Weeds  
422 Using <sup>14</sup>C-Herbicide Absorption, Translocation, and Metabolism. In *Herbicide Resistance in Weeds*  
423 *and Crops*. IntechOpen; 2017.
- 424 Migliozi A, Cona F, Di Gennaro A, Mingo A, Saracino A, Mazzoleni S. Land-use management and  
425 changes in campania region (southern Italy): examples from ten regional state forestS In: *Proceedings*  
426 *of IUFRO–Forest Landscapes and Global Change–New Frontiers in Management, Conservation and*  
427 *Restoration*; 2002. p. 21–27.
- 428 Miller NF. Working with Nature to Preserve Site and Landscape at Gordion. In: Rose CB, ed. *The*  
429 *Archaeology of Phrygian Gordion, Royal City of Midas*. Philadelphia, PA: University of  
430 Pennsylvania Museum of Archaeology; 2012 p. 243–258.
- 431 Minissale P, Trigilia A, Brogna F, Sciandrello S Plants and vegetation in the archaeological park of  
432 Neapolis of Syracuse (Sicily, Italy): a management effort and also an opportunity for better enjoyment  
433 of the site. *Conservation and Management of Archaeological Sites* 2015;17(4):340-369.
- 434 Mishra AK, Garg KL, Jain KK, Kamlakar G, Rao VP. Microbiological deterioration of stone: An  
435 overview. In: Kamlakar, G., Rao, V.P. (Eds.), *Conservation, preservation and restoration: traditions,*  
436 *trends and techniques*. Birla Archeological and Cultural Research Institute, Hyderabad. 1995 p. 217-  
437 228.
- 438 Mooney HA, Dunn EL. Convergent evolution of Mediterranean-climate evergreen sclerophyll  
439 shrubs. *Evolution*. 1970;24(2):292-303.
- 440 Mortland MM, Lawton K, Uehara G. Alteration of biotite to vermiculite by plant growth. *Journal of*  
441 *Soil Science*. 1956;82:477-481.
- 442 Motti R, Stinca A Analysis of the biodeteriogenic vascular flora at the Royal Palace of Portici in  
443 southern Italy. *Int Biodeterior Biodegradation*. 2011;65(8), 1256-1265.
- 444 Motti R, Bonanomi G. Vascular plant colonisation of four castles in southern Italy: Effects of  
445 substrate bioreceptivity, local environment factors and current management. *Int Biodeterior*  
446 *Biodegradation*. 2018;133:26-33.
- 447 Motti R, Maisto A, Migliozi A, Mazzoleni S. Agricultural and forestal landscape changes of the  
448 Phlegrean Fields during the XX century. *Italian Botanist*. 2004;36 (2):577-583
- 449 Motti R, Ricciardi M. La flora dei campi Flegrei (Golfo di Pozzuoli, Campania, Italia). *Webbia*.  
450 2005;60(2):395-476.
- 451 Motti R., Ricciardi M. Il paesaggio vegetale. Campi Flegrei, atlante della biodiversità. Electa, Napoli;  
452 2008.
- 453 Pacini E, Signorini MA. Vascular plants. In: *Plant Biology for Cultural Heritage Biodeterioration and*  
454 *Conservation*. 87-96; 2009.
- 455 Papafotiou M, Kanellou E, Economou G. 2010. Alternative practices for vegetation management in  
456 archaeological sites - the case of Eleusis. *Acta Hortic*. 2010;881:879–883.
- 457 Papafotiou M, Kanellou E, Economou G. Integrated design and management of vegetation at  
458 archaeological sites to protect monuments and enhance the historical landscape. In *VI International*  
459 *Conference on Landscape and Urban Horticulture* 1189 (pp. 1-10); 2016.
- 460 Pignatti S, Guarino R, La Rosa M. *Flora d'Italia*, Vol. 1. Edagricole, Bologna; 2017a.
- 461 Pignatti S, Guarino R, La Rosa M. *Flora d'Italia*, Vol. 2. Edagricole, Bologna; 2017b.
- 462 Pignatti S, Guarino R, La Rosa M. *Flora d'Italia*, Vol. 3. Edagricole, Bologna; 2018
- 463 Pignatti S. *Flora d'Italia* 1-3. Edagricole, Bologna; 1982.

- 464 Pinna D, Salvadori O. Meccanismi generali dei processi di biodeterioramento. In: Caneva G. Nugari  
465 M.P. Salvadori O. (Eds.) *La Biologia Vegetale per i Beni Culturali* vol. I. Nardini Editore Firenze.  
466 2002; p. 15-34.
- 467 Pinna D, Salvadori O. Stone and related materials. *Plant Biology for Cultural Heritage.*  
468 *Biodeterioration and Conservation*, 87-96; 2009.
- 469 Raunkiaer C. *The Life Forms and Statistical Plant Geography*. Oxford Clarendon Press; 1934.
- 470 Rosi M, Sbrana A, Principe C. The Phlegraean Fields: structural evolution, volcanic history and  
471 eruptive mechanisms. *Journal of Volcanology and Geothermal Research*. 1983;17(1-4):273-288.
- 472 Segal S. *Ecological Notes on wall Vegetation*. Springer-Science+Business Media, BV; 1969
- 473 Signorini MA. L'indice di Pericolosità: un contributo del botanico al controllo della vegetazione  
474 infestante nelle aree monumentali. *Informatore Botanico Italiano*. 1996;28:7-14.
- 475 Signorini MA. Lo studio e il controllo della vegetazione infestante nei siti archeologici. Una proposta  
476 metodologica. L'area archeologica di Fiesole. Rilievi e ricerche per la conservazione. Alinea ed.,  
477 Firenze, 41-46; 1995.
- 478 Spampinato G, Guglielmo A, Pavone P, Tomaselli V. Analisi della flora e della vegetazione delle  
479 aree archeologiche della Sicilia orientale finalizzata alla tutela e valorizzazione dei manufatti  
480 architettonici. *Informatore Botanico Italiano*. 2005;37, 830-831:1, parte B
- 481 Tjellén AKE, Kristiansen SM, Matthiesen H, Pedersen O. Impact of roots and rhizomes on wetland  
482 archaeology: a review. *Conservation and management of Archaeological Sites*. 2015;17(4):370-391.
- 483 Tutin TG, Burges NA, Chater AO, Edmondson JR, Heywood VH, Moore DM et al. (EdS). *Flora*  
484 *Europaea* 1, second ed. Cambridge University Press; 1993.
- 485 Tutin TG, Heywood VH, Burges NA, Valentine DH, Walters SM, Webb, DA (EdS). *Flora Europaea*  
486 1-5. Cambridge University Press; 1964 and 1980.
- 487 Wieser G, Tausz M. *Trees at Their Upper Limit: Treelife Limitation at the alpine Timberline*, vol. 5  
488 Springer, Dordrecht, NL; 2007.
- 489 Wilson A. The economic impact of technological advances in the Roman construction industry.  
490 *Innovazione tecnica e progresso economico nel mondo romano*, 225-236; 2006.
- 491
- 492



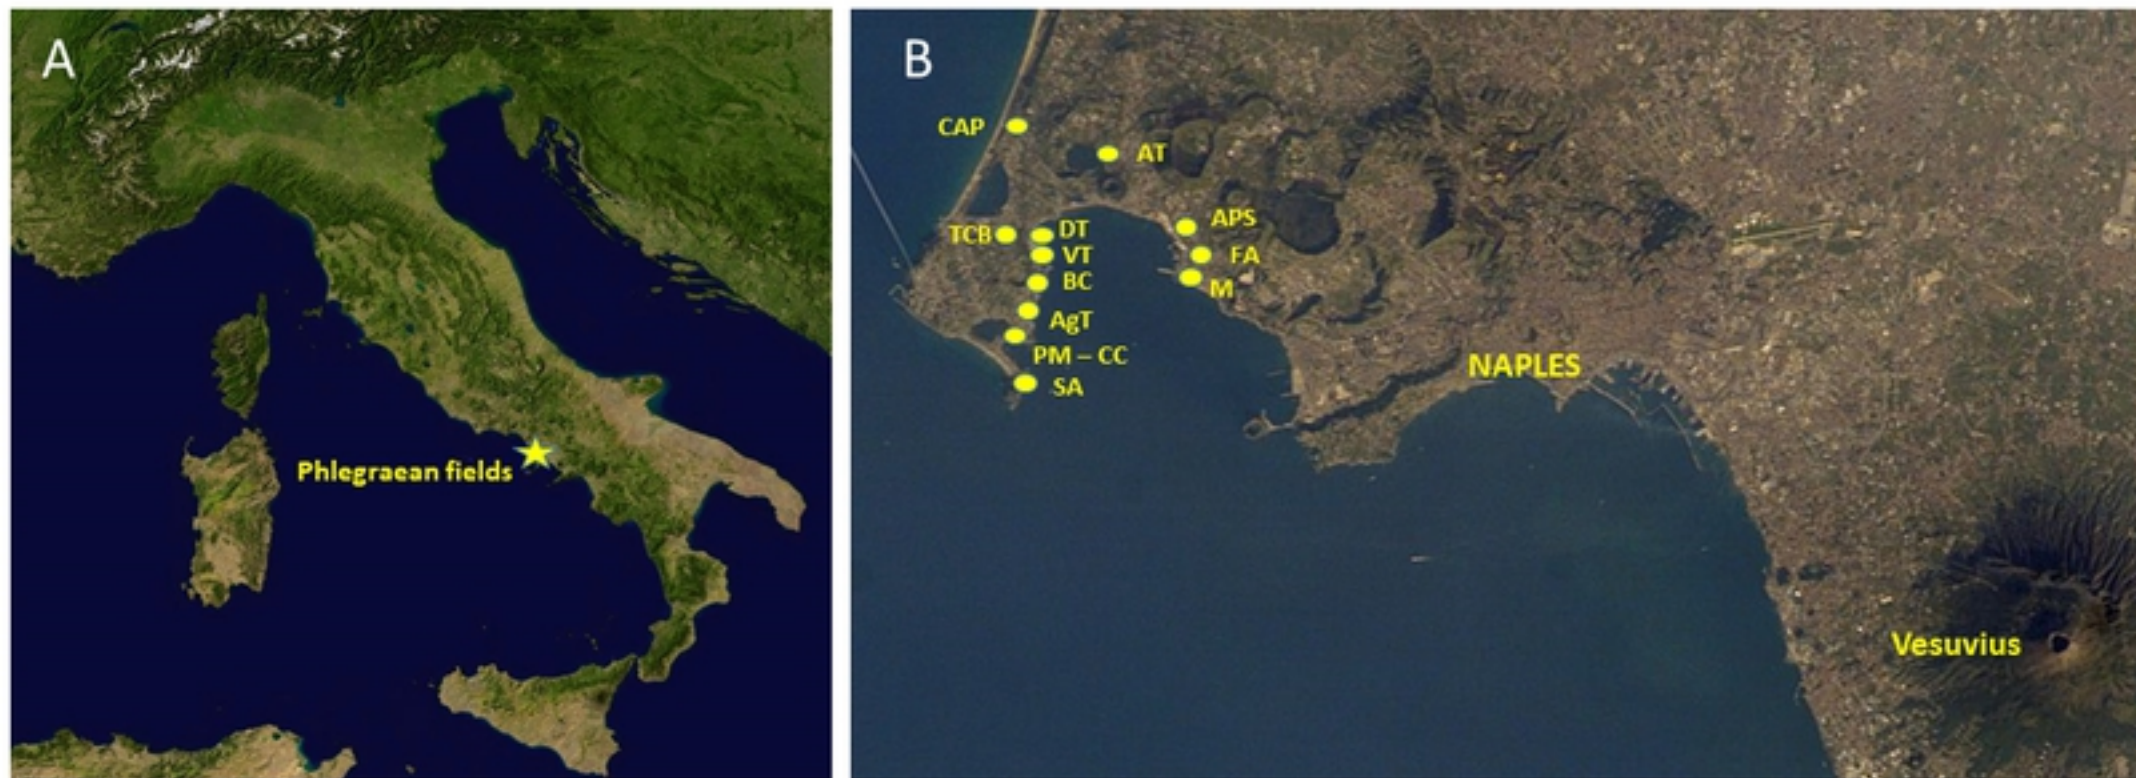

Figure



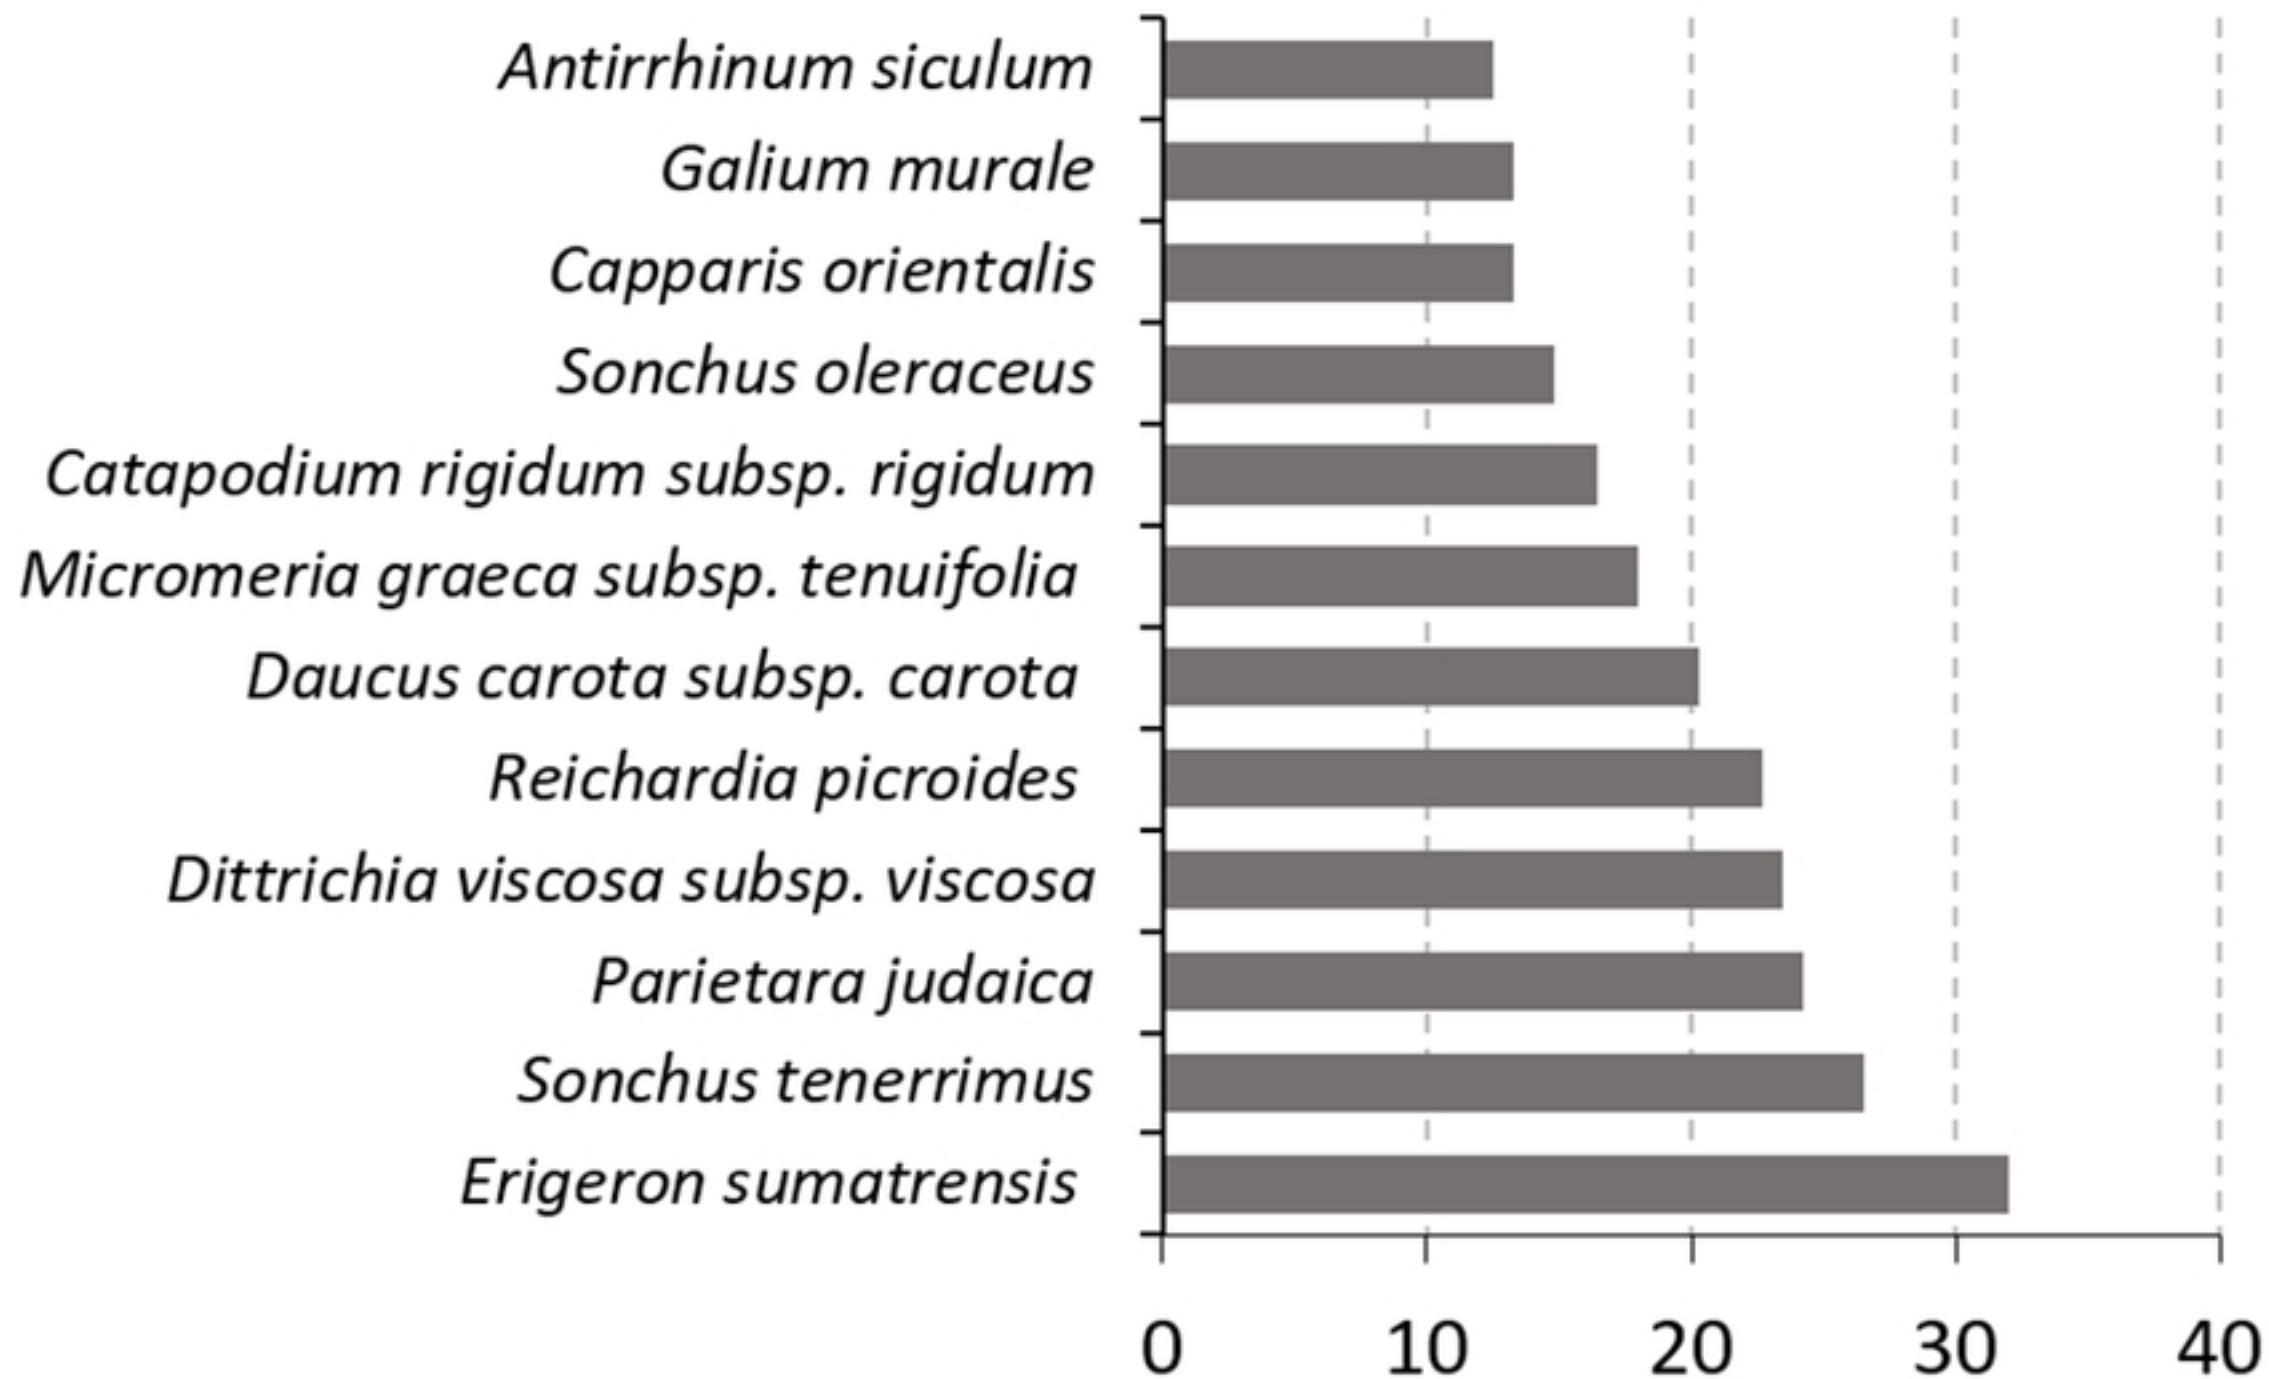

Figure

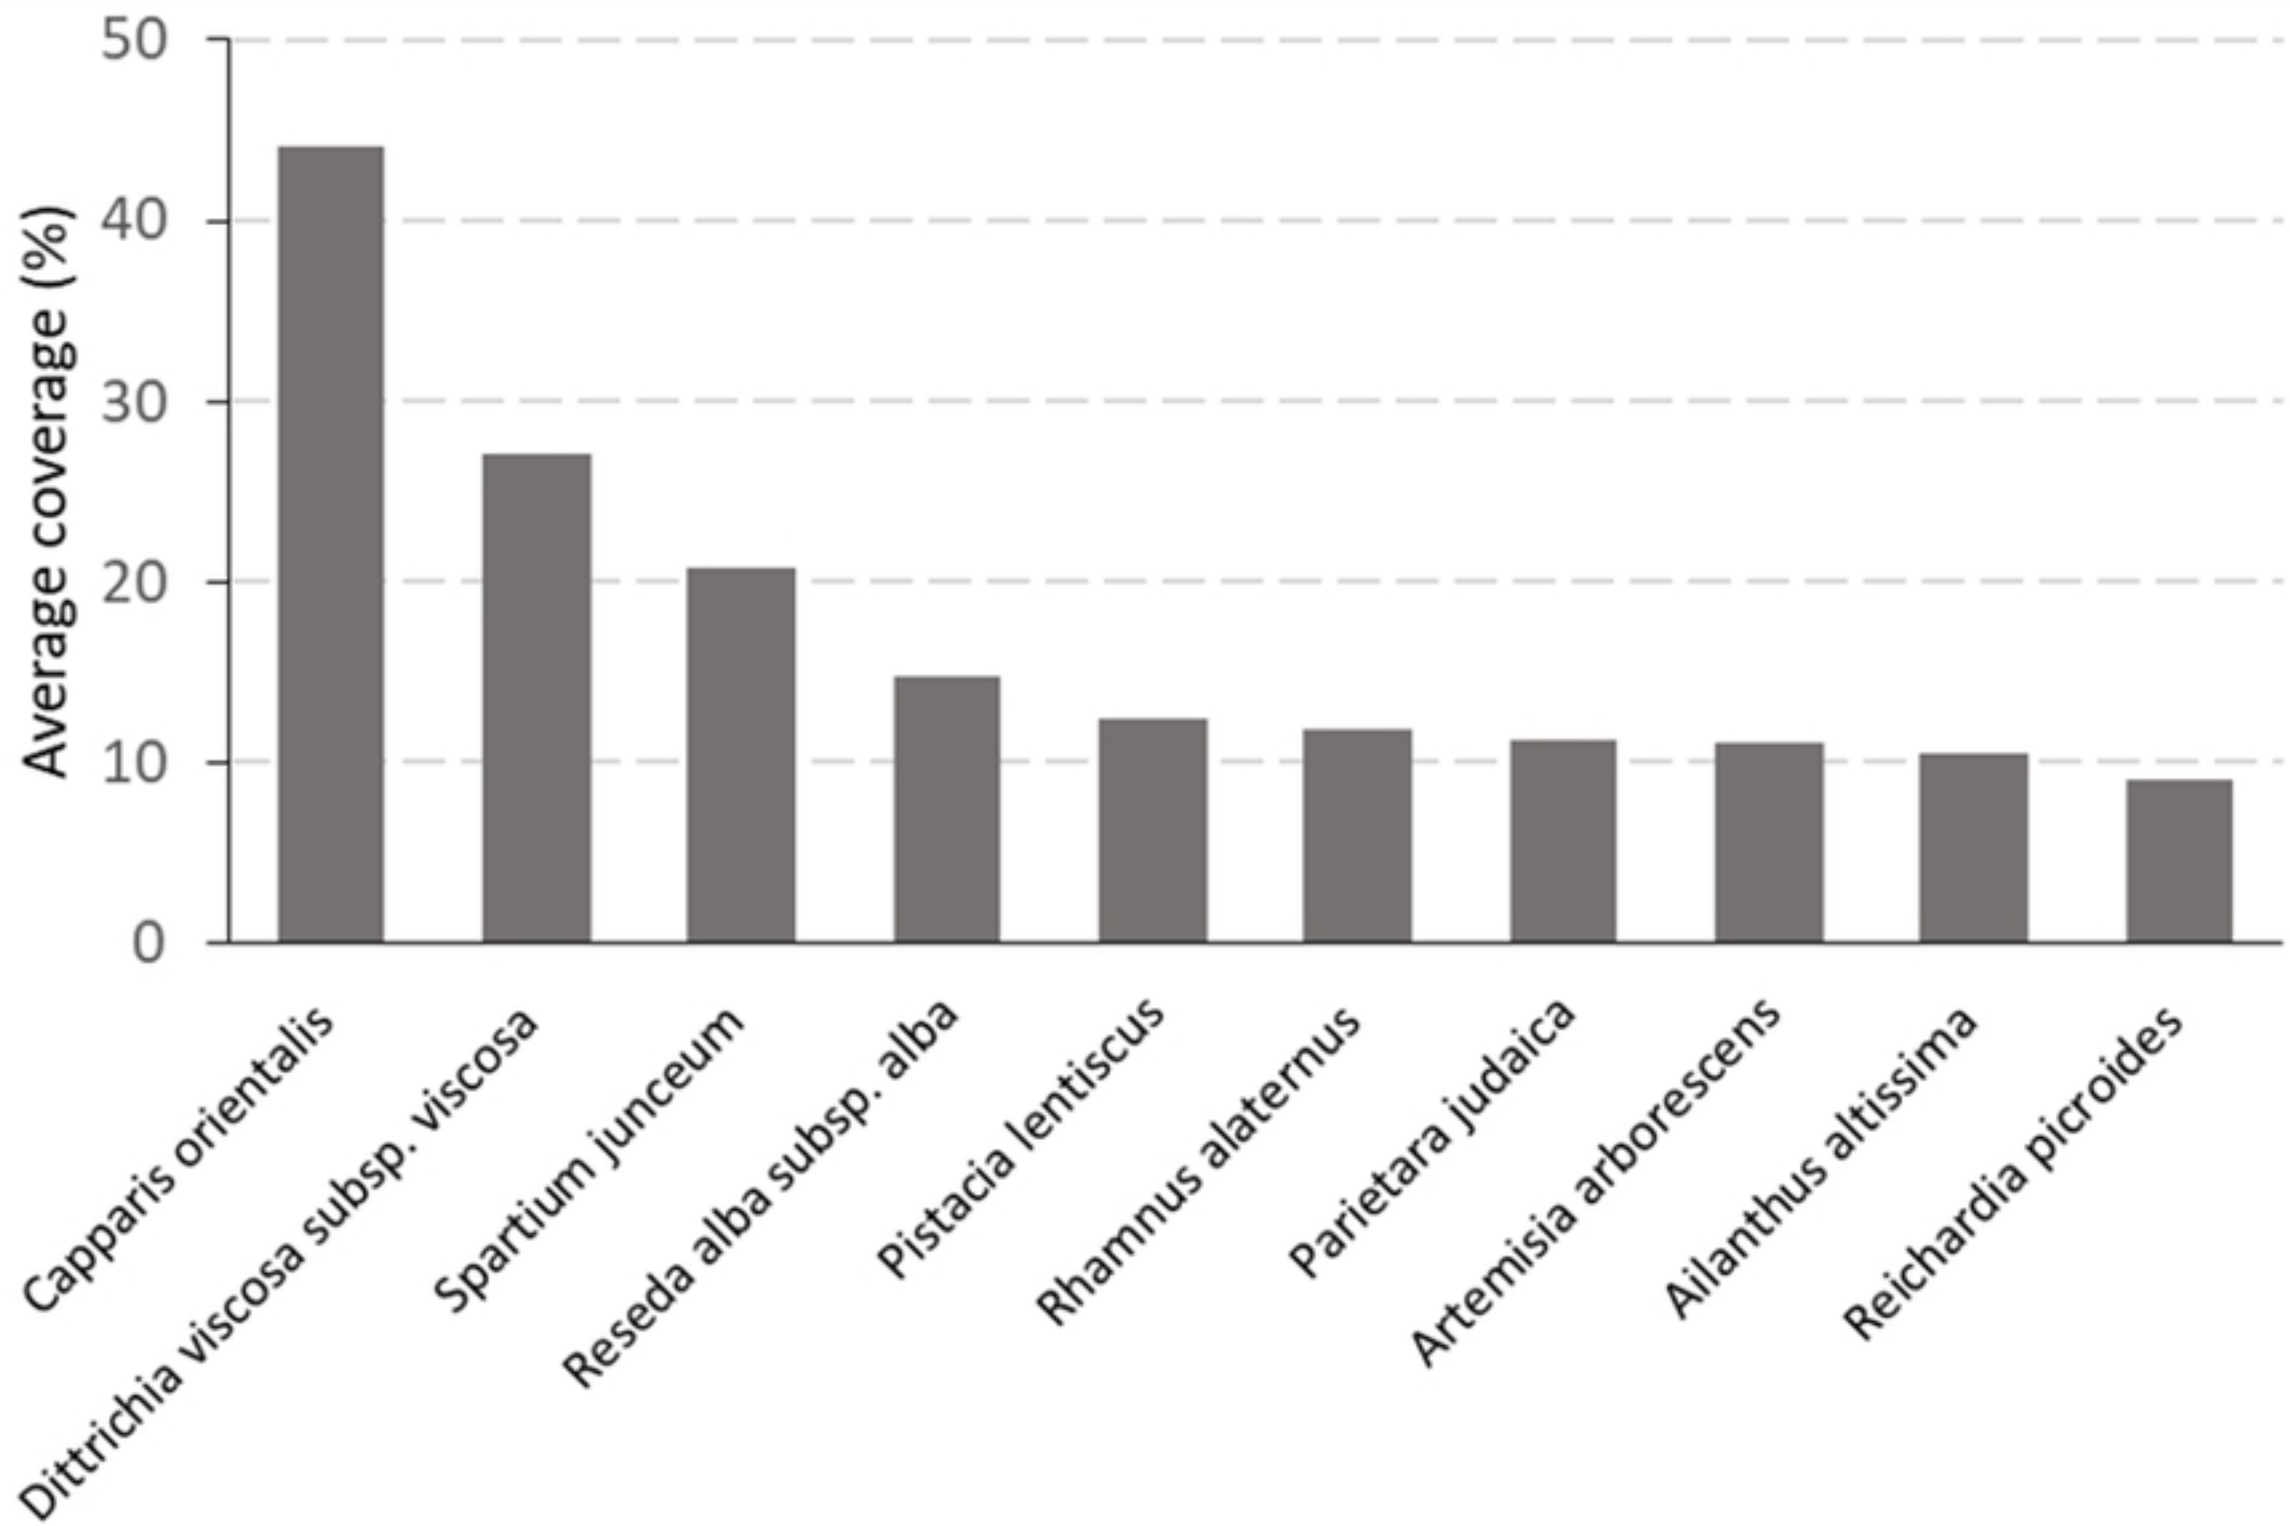

Figure

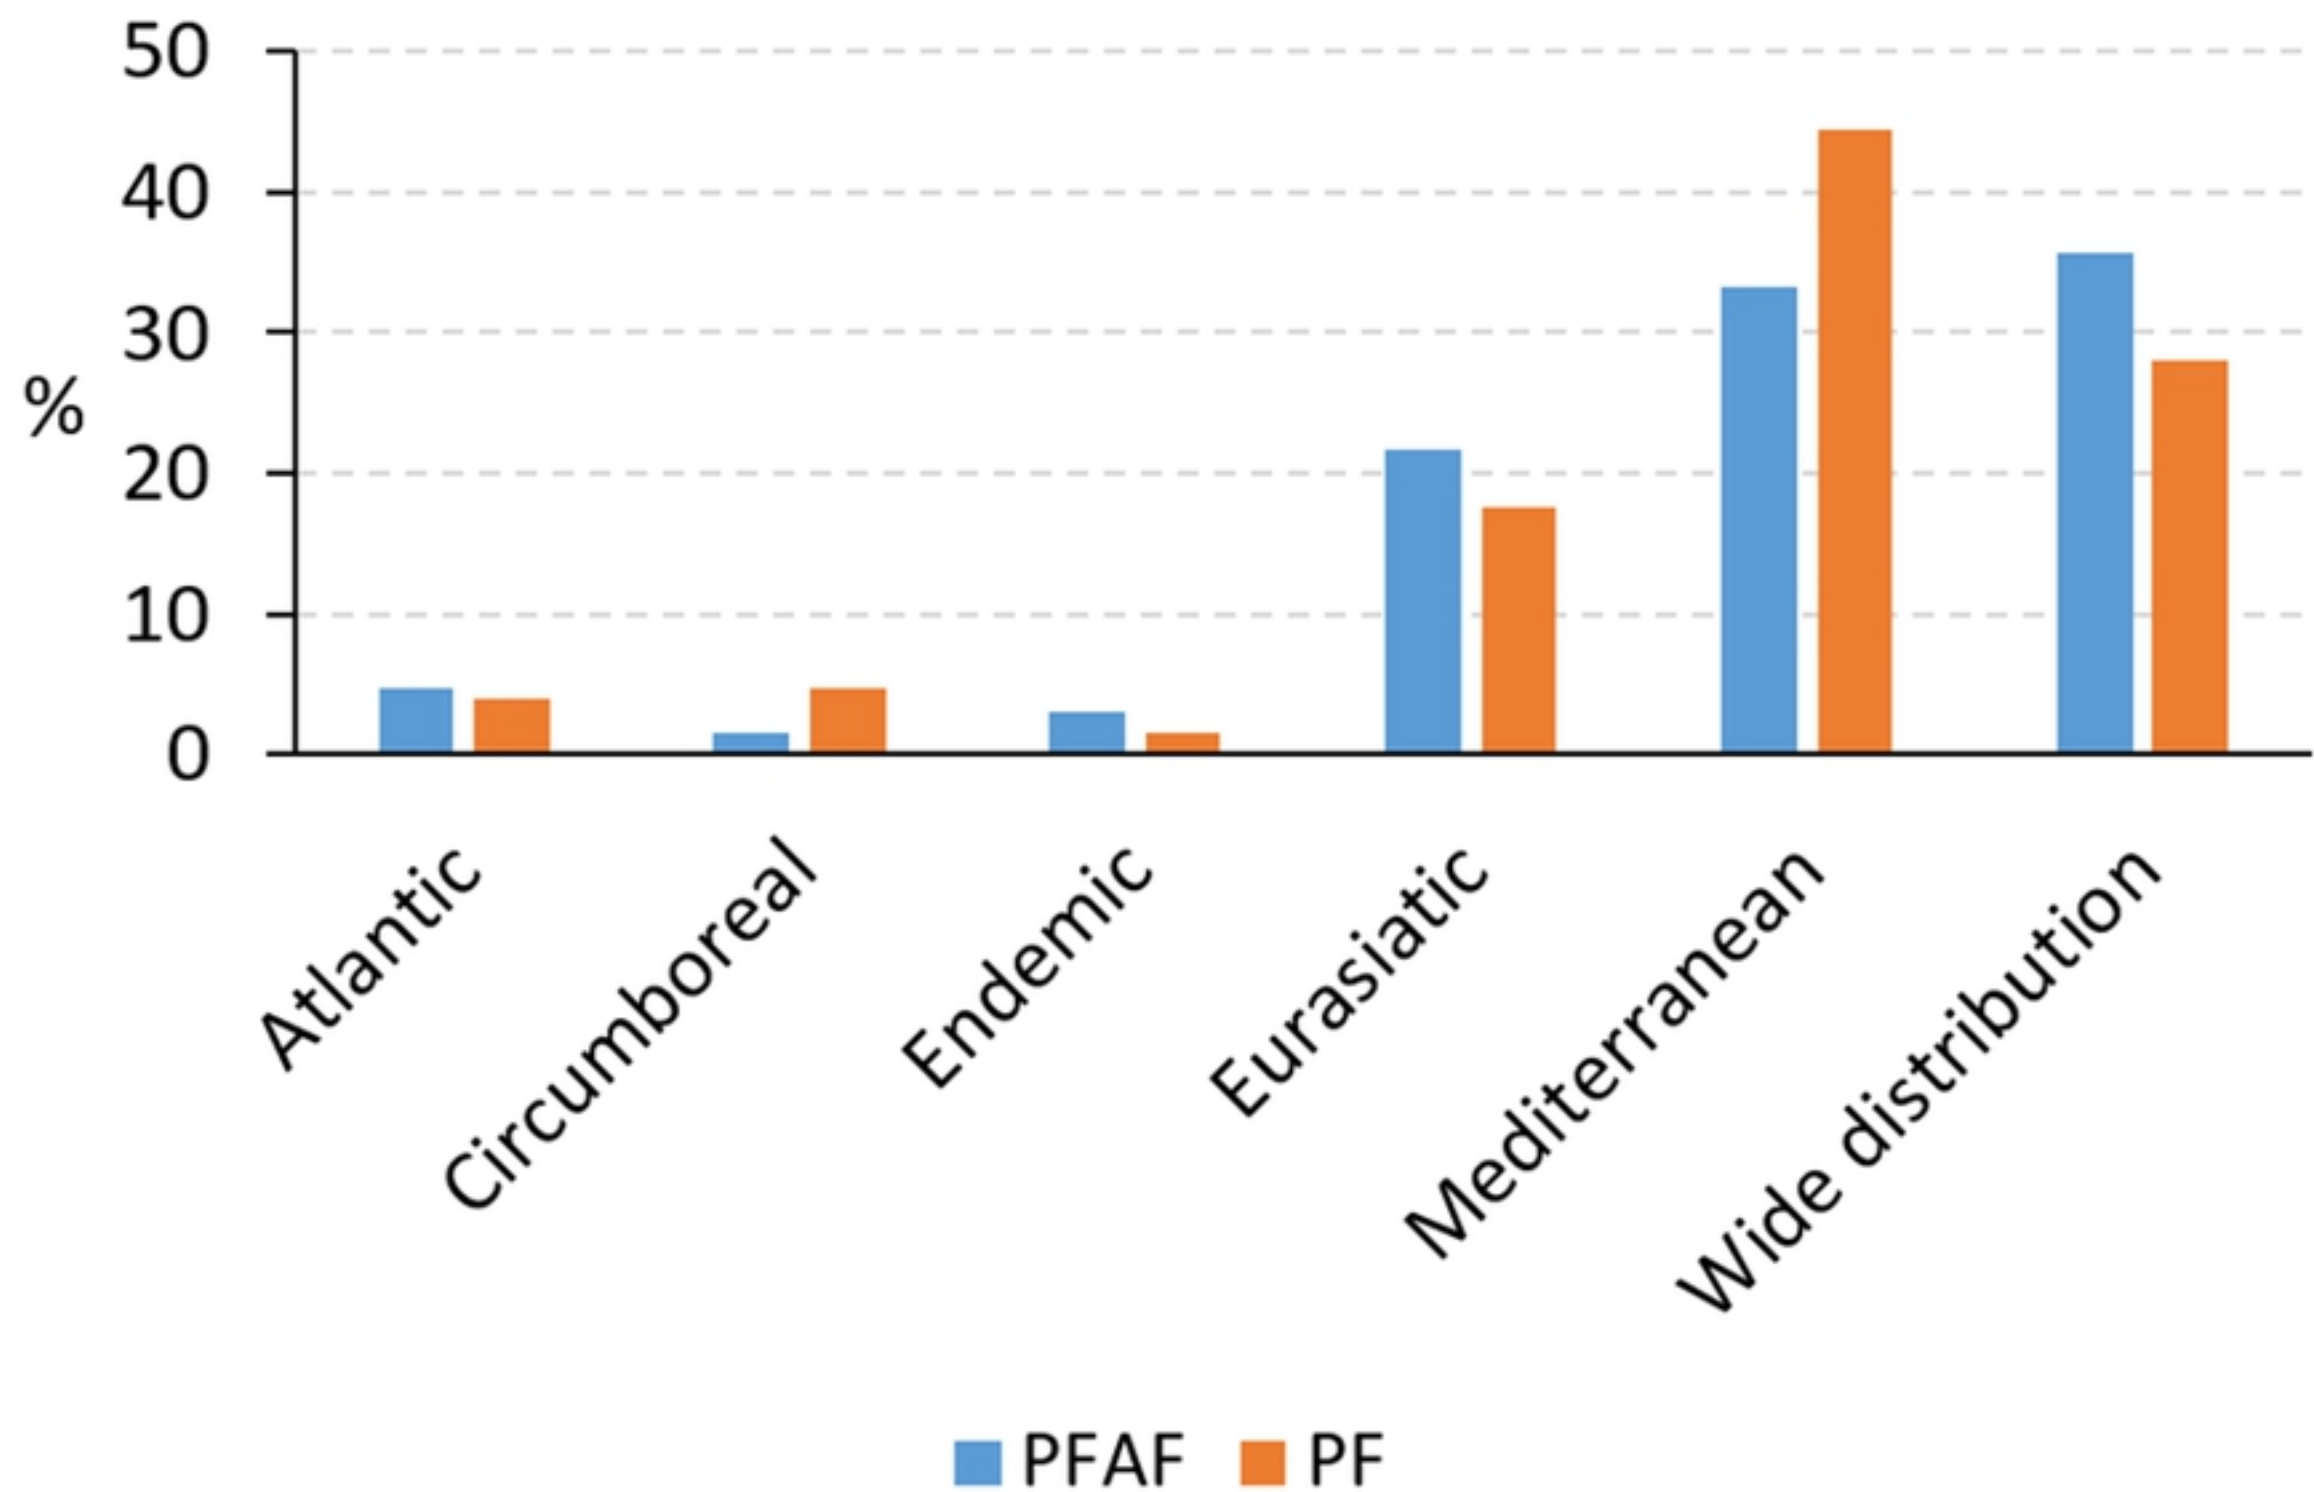

Figure

A

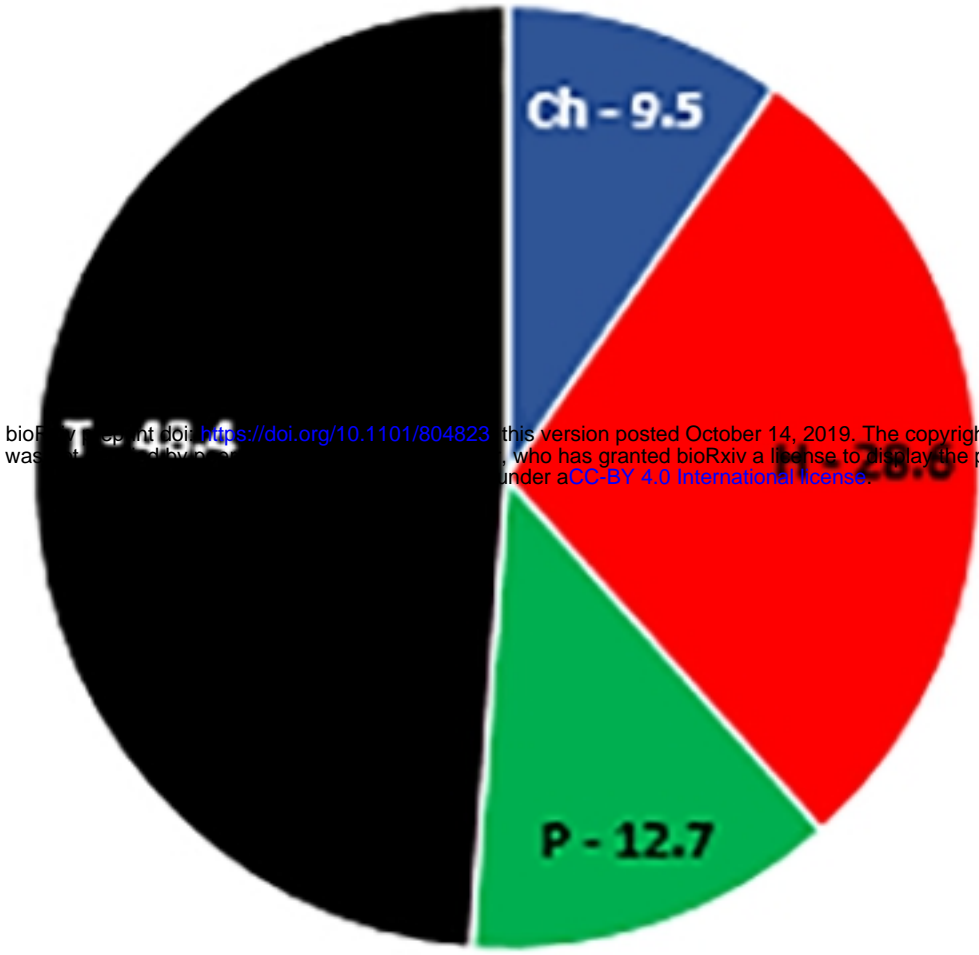

bioRxiv preprint doi: <https://doi.org/10.1101/804823>; this version posted October 14, 2019. The copyright holder for this preprint (which was not certified by peer review) is the author/funder, who has granted bioRxiv a license to display the preprint in perpetuity. It is made available under aCC-BY 4.0 International license.

B

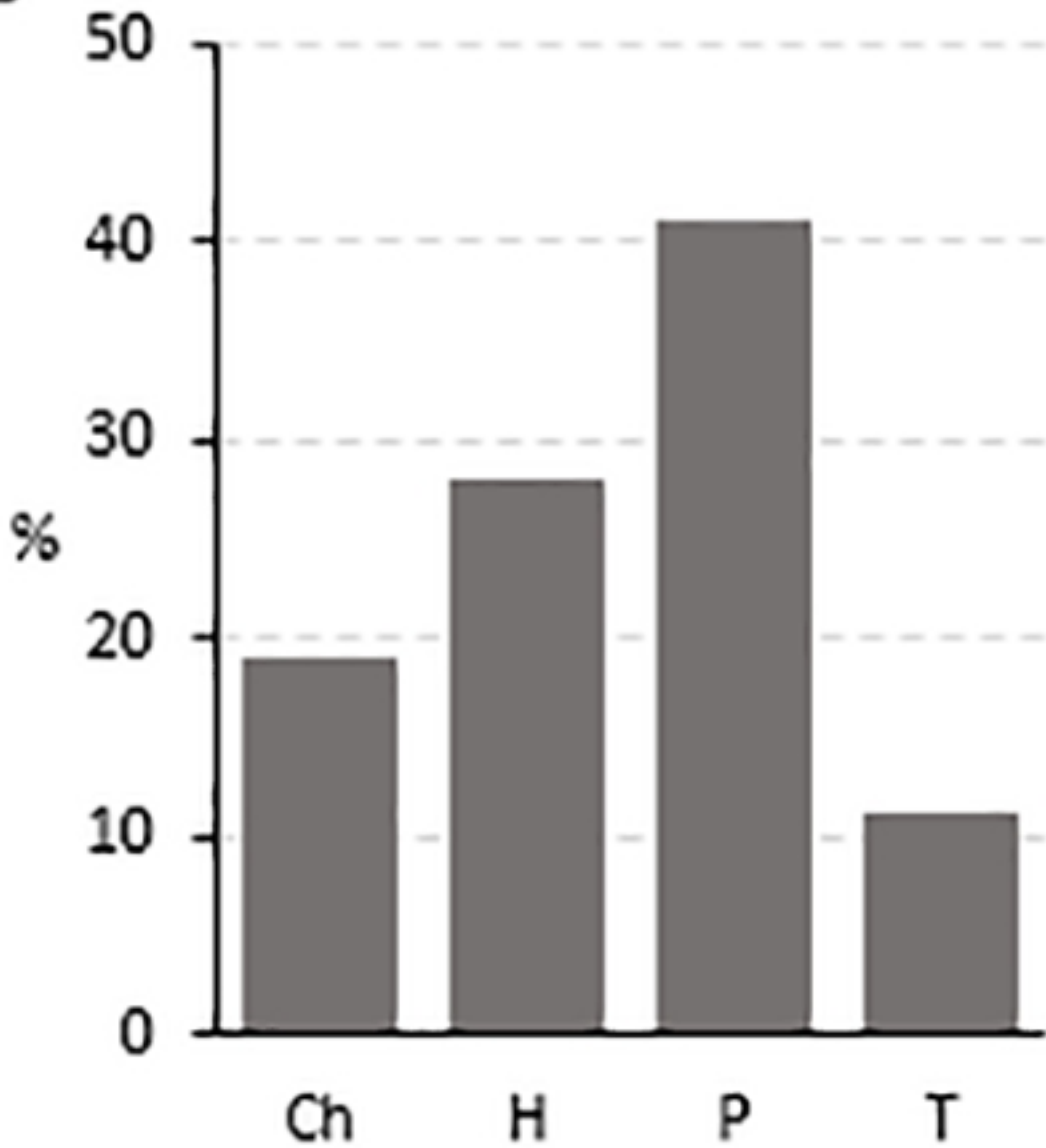

Figure

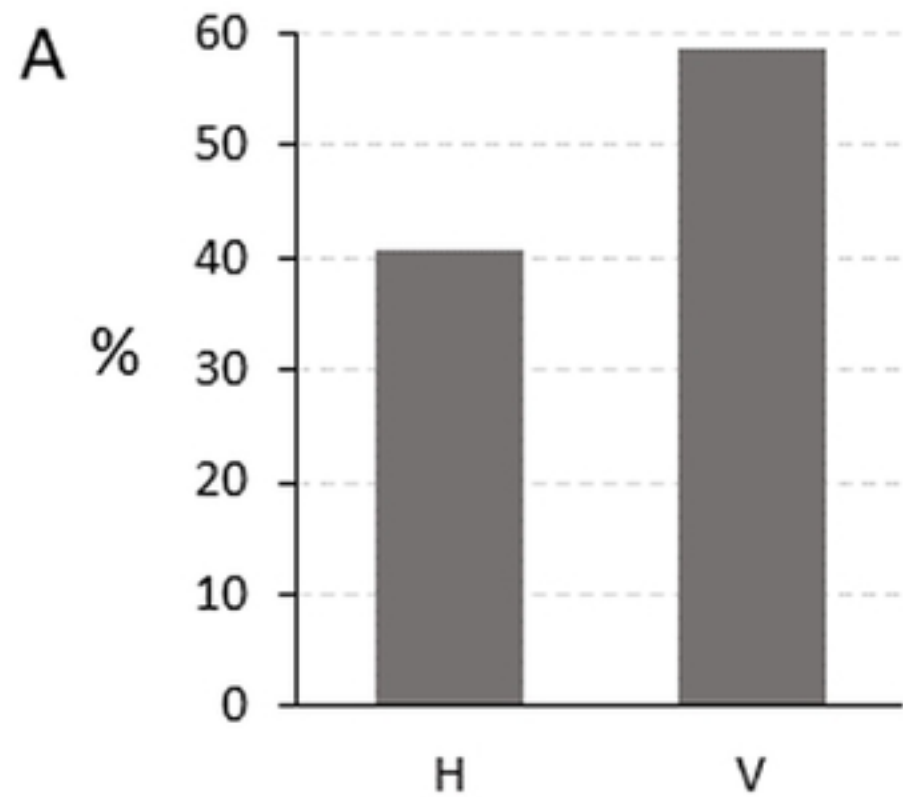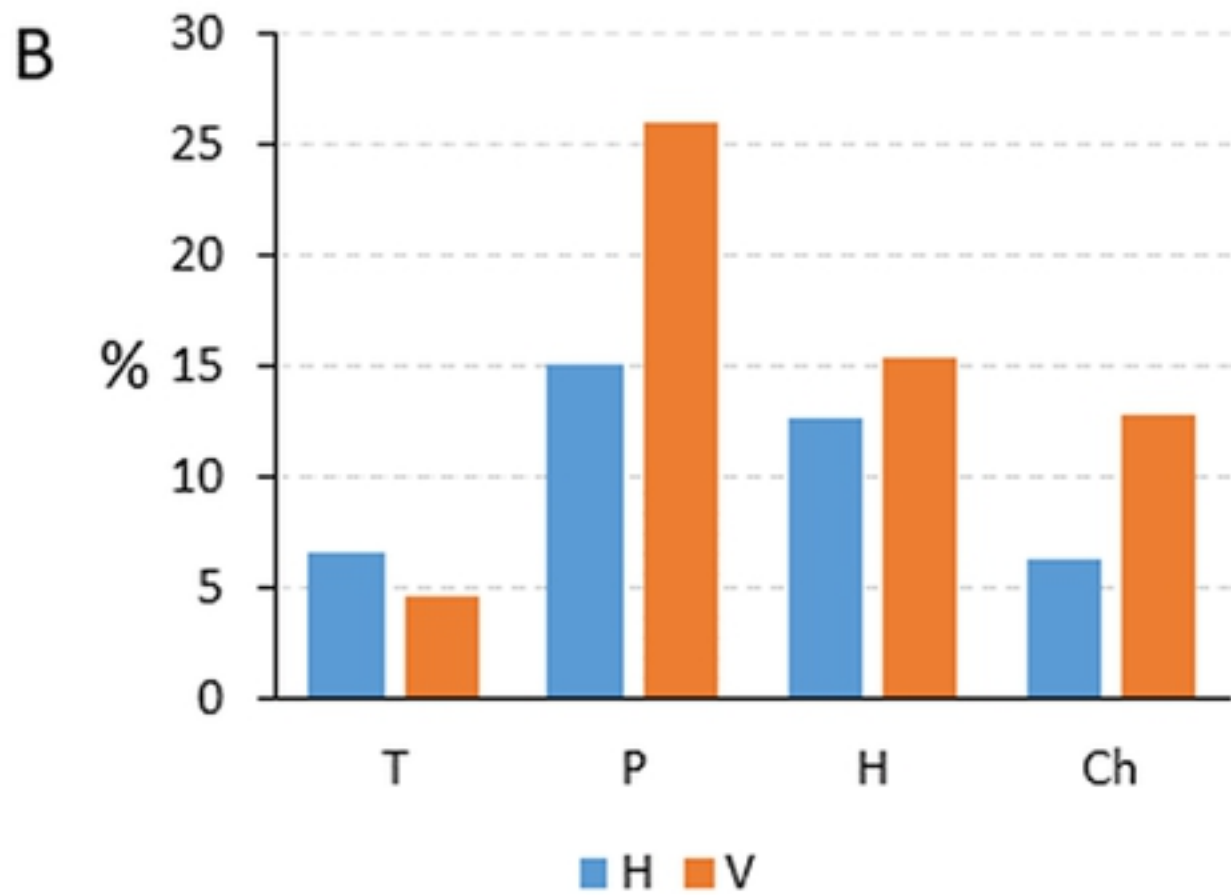

Figure

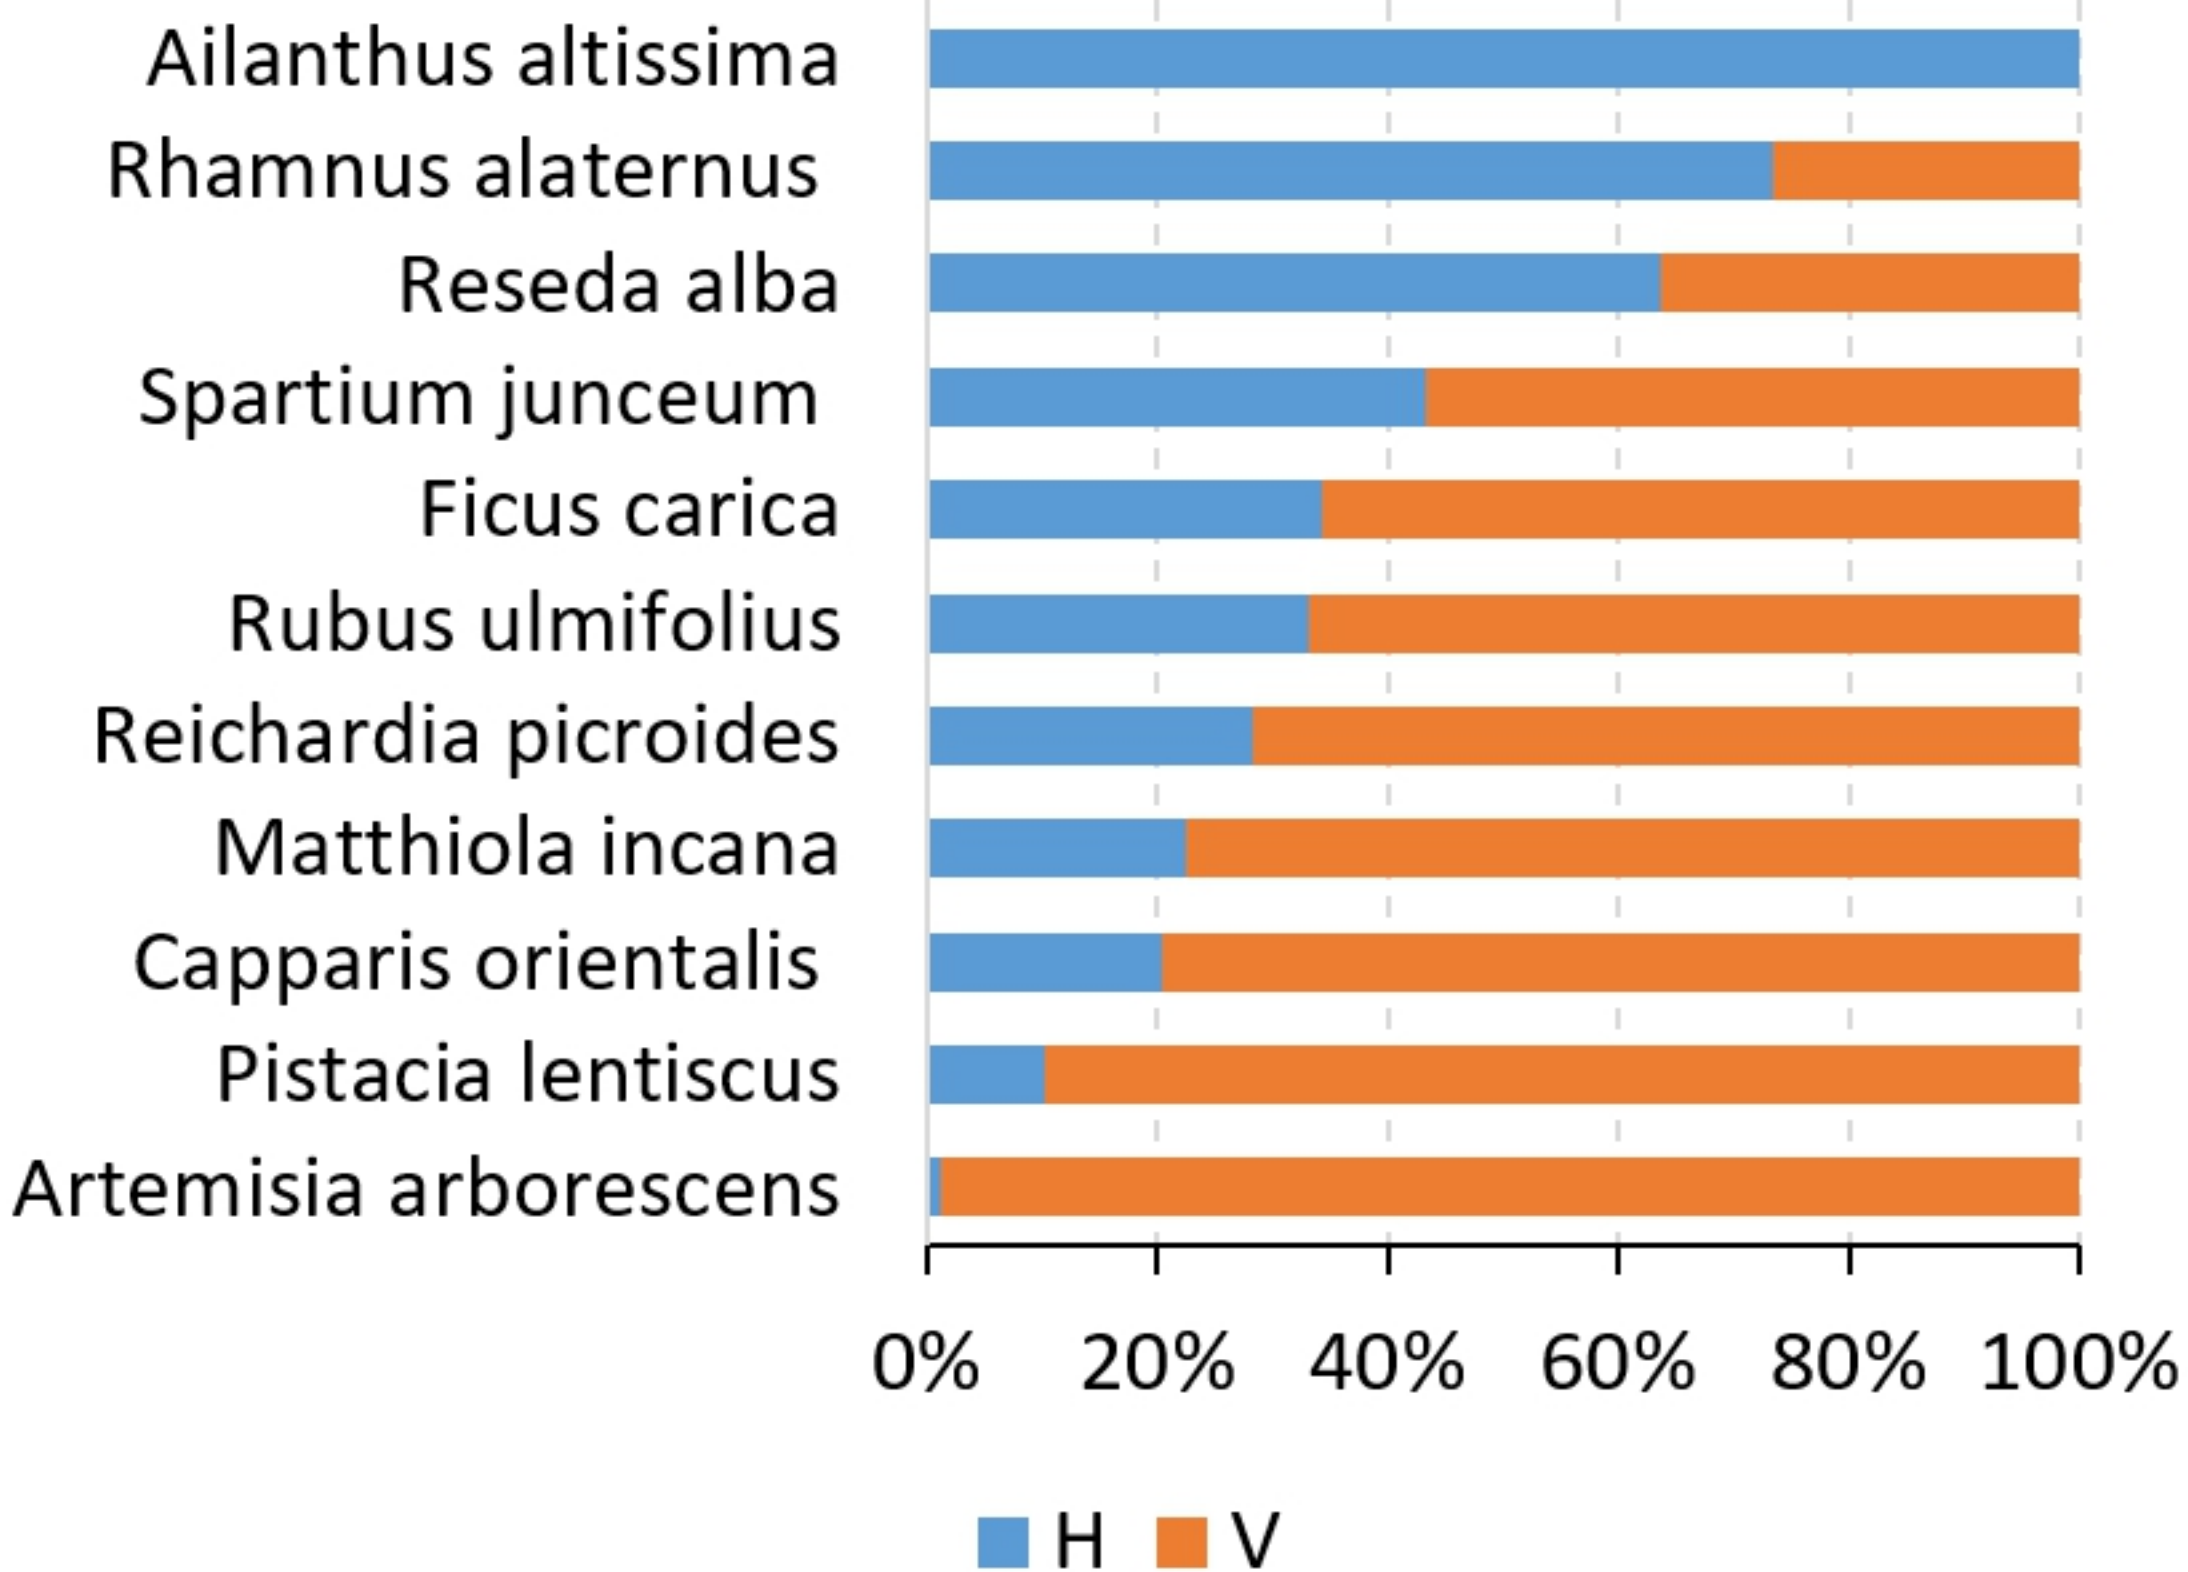

Figure

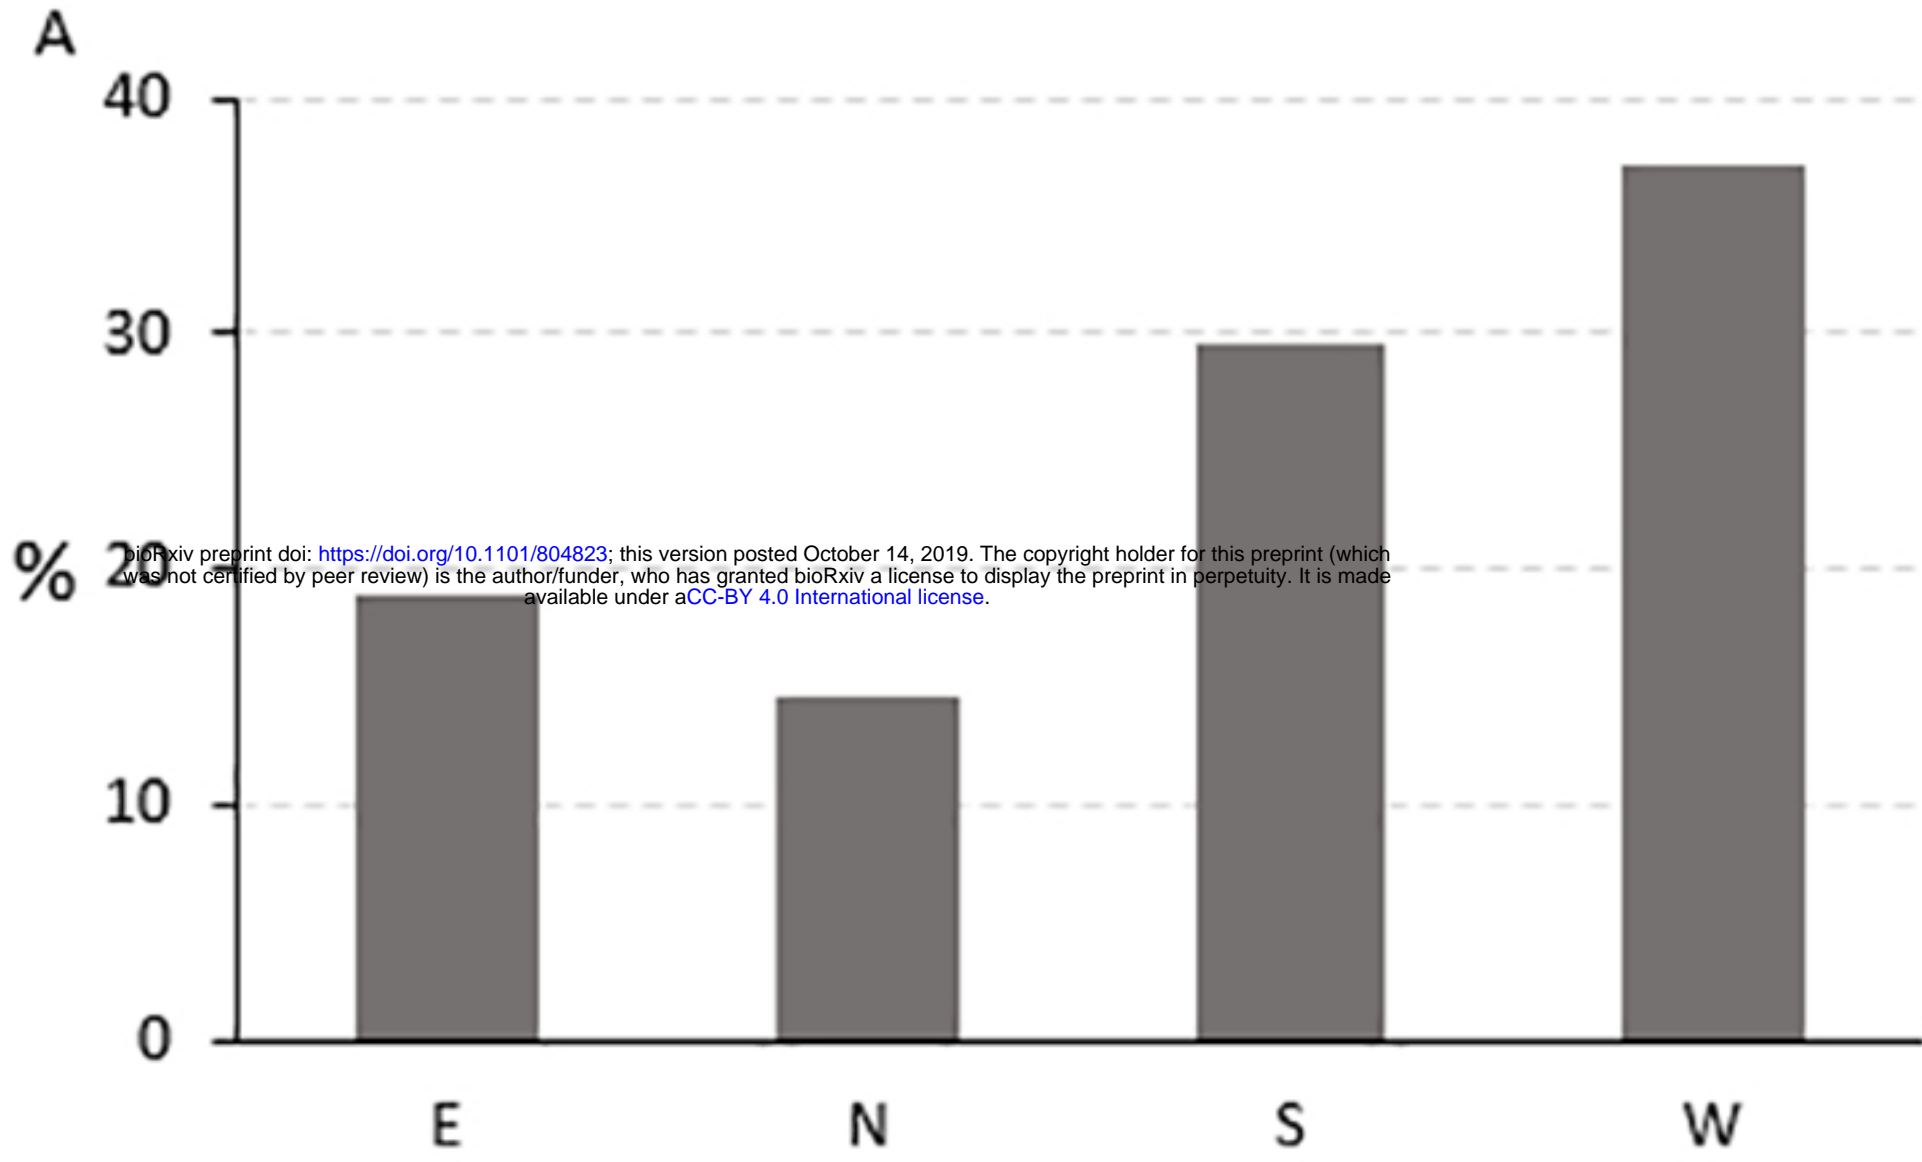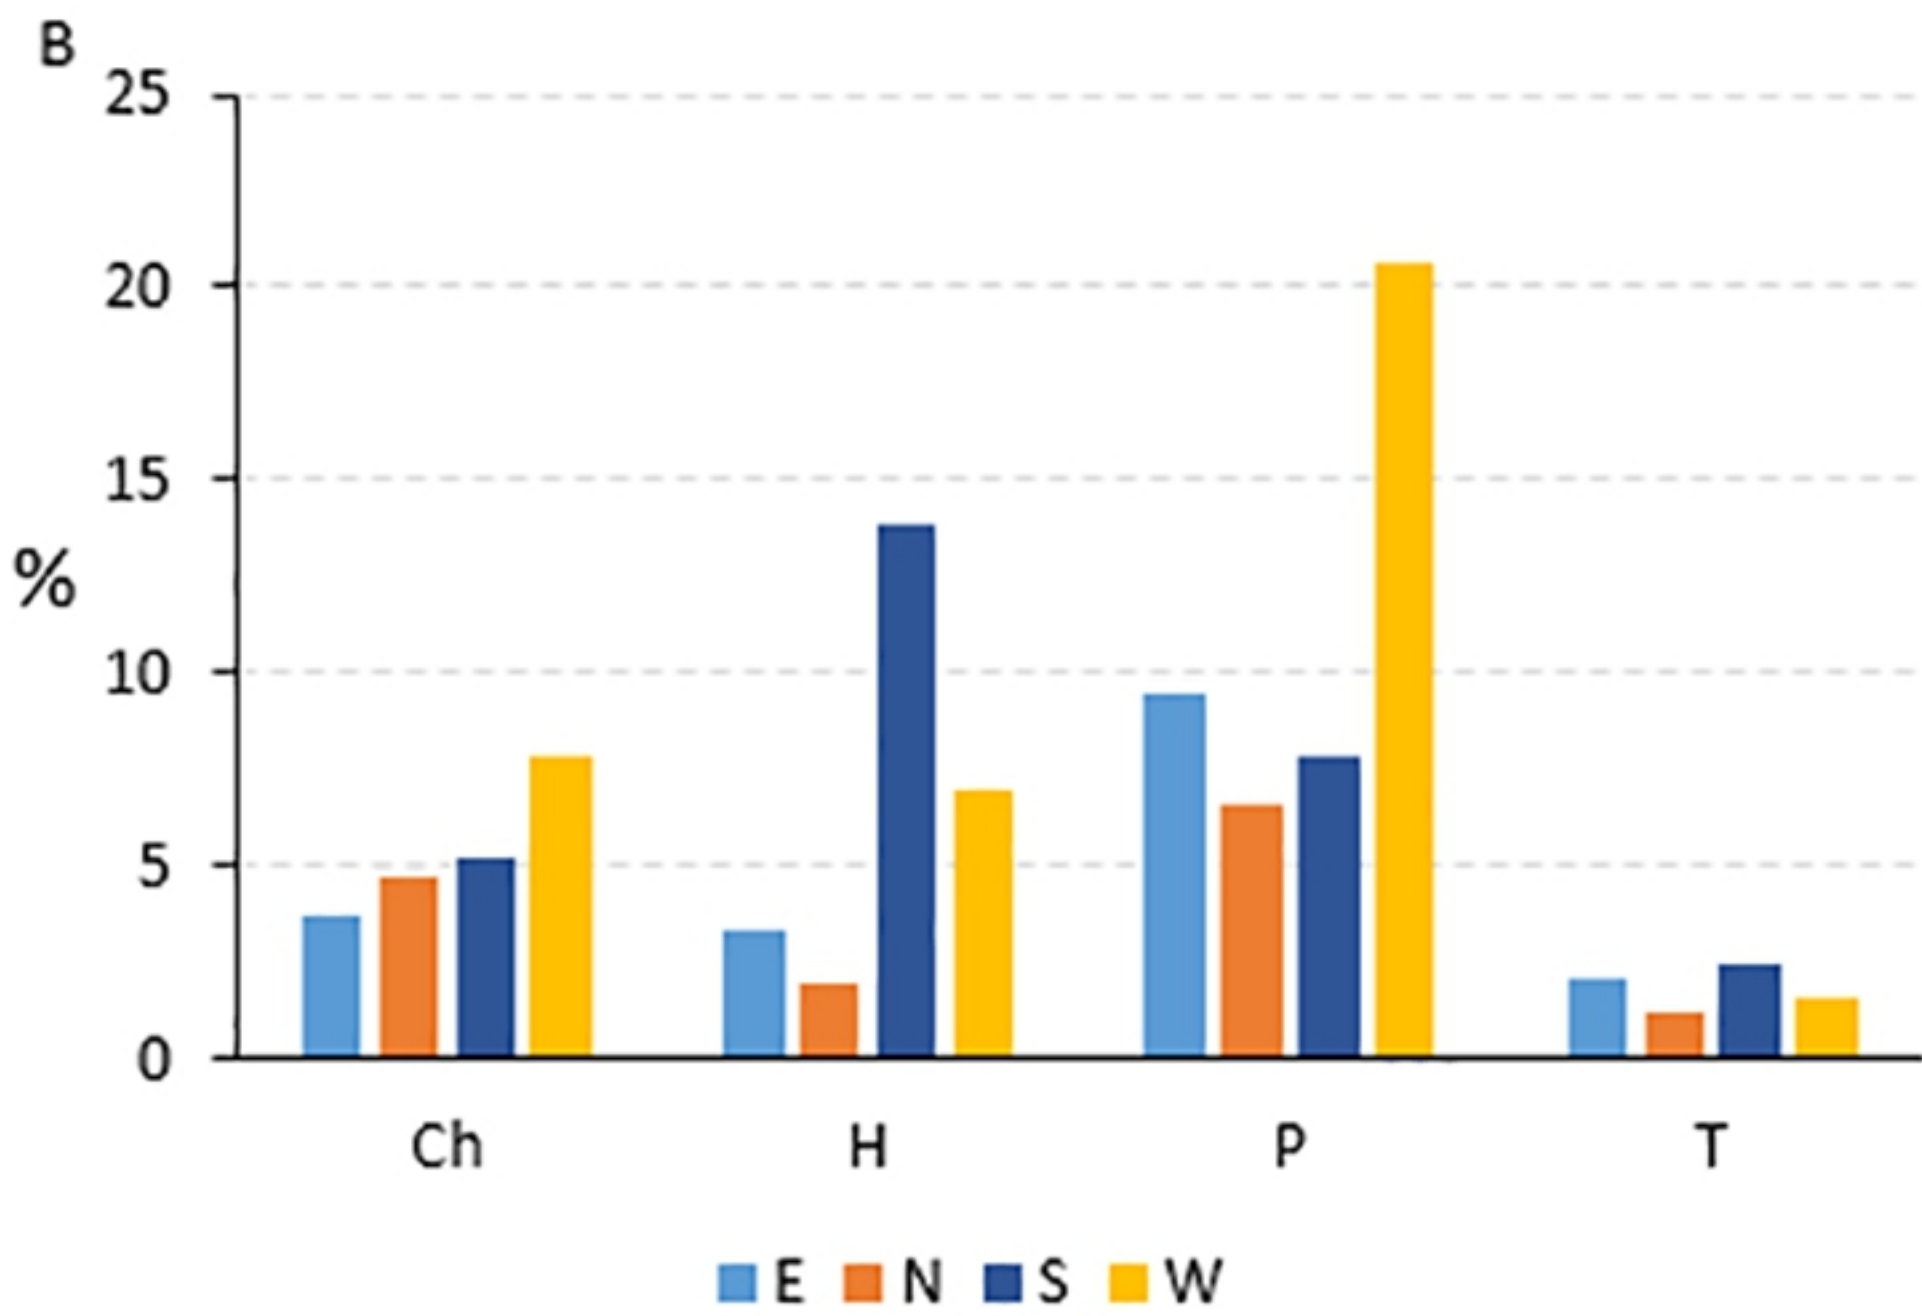

Figure



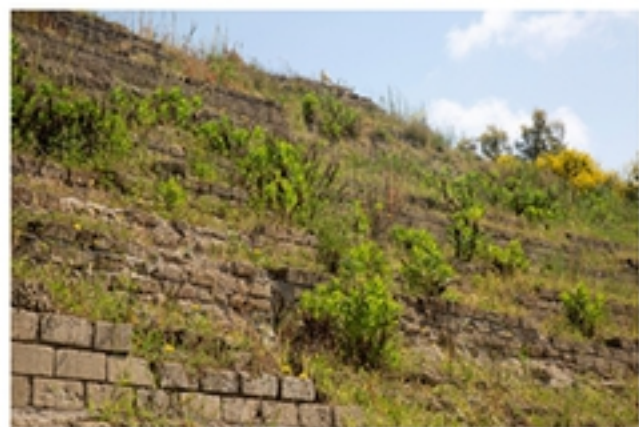

A

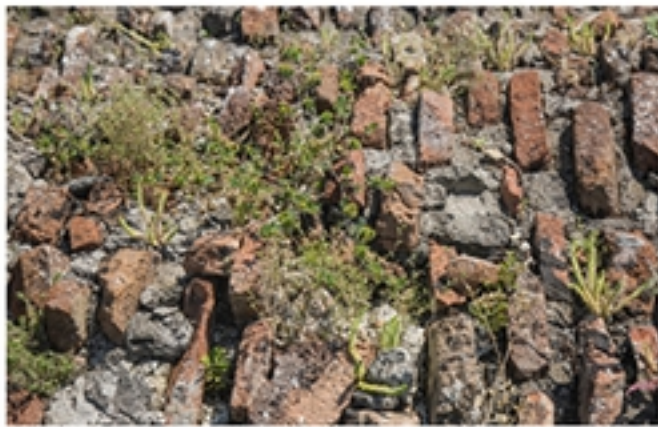

B

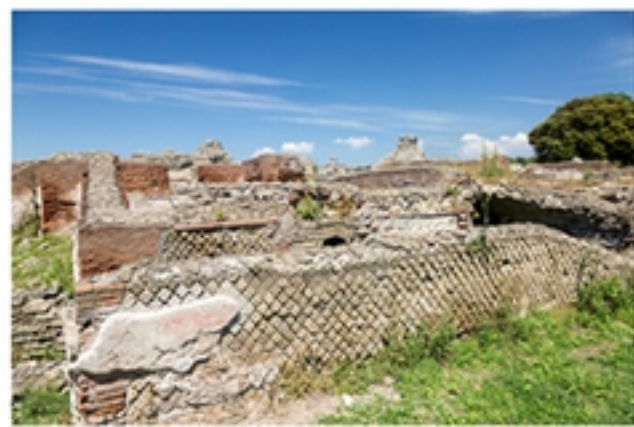

C

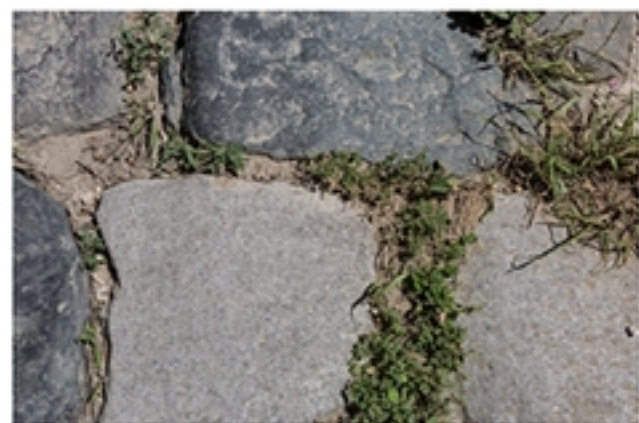

D

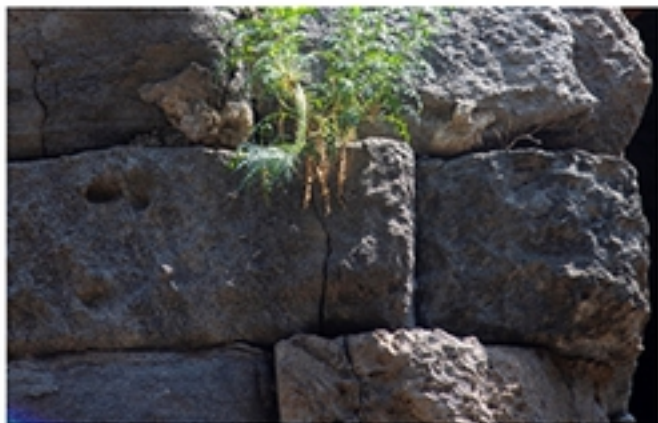

E

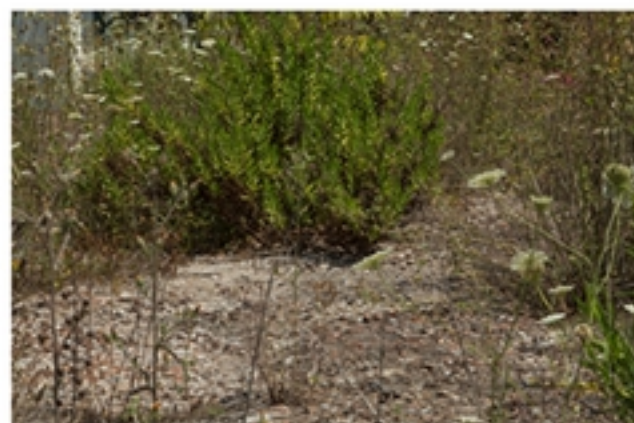

F

Figure

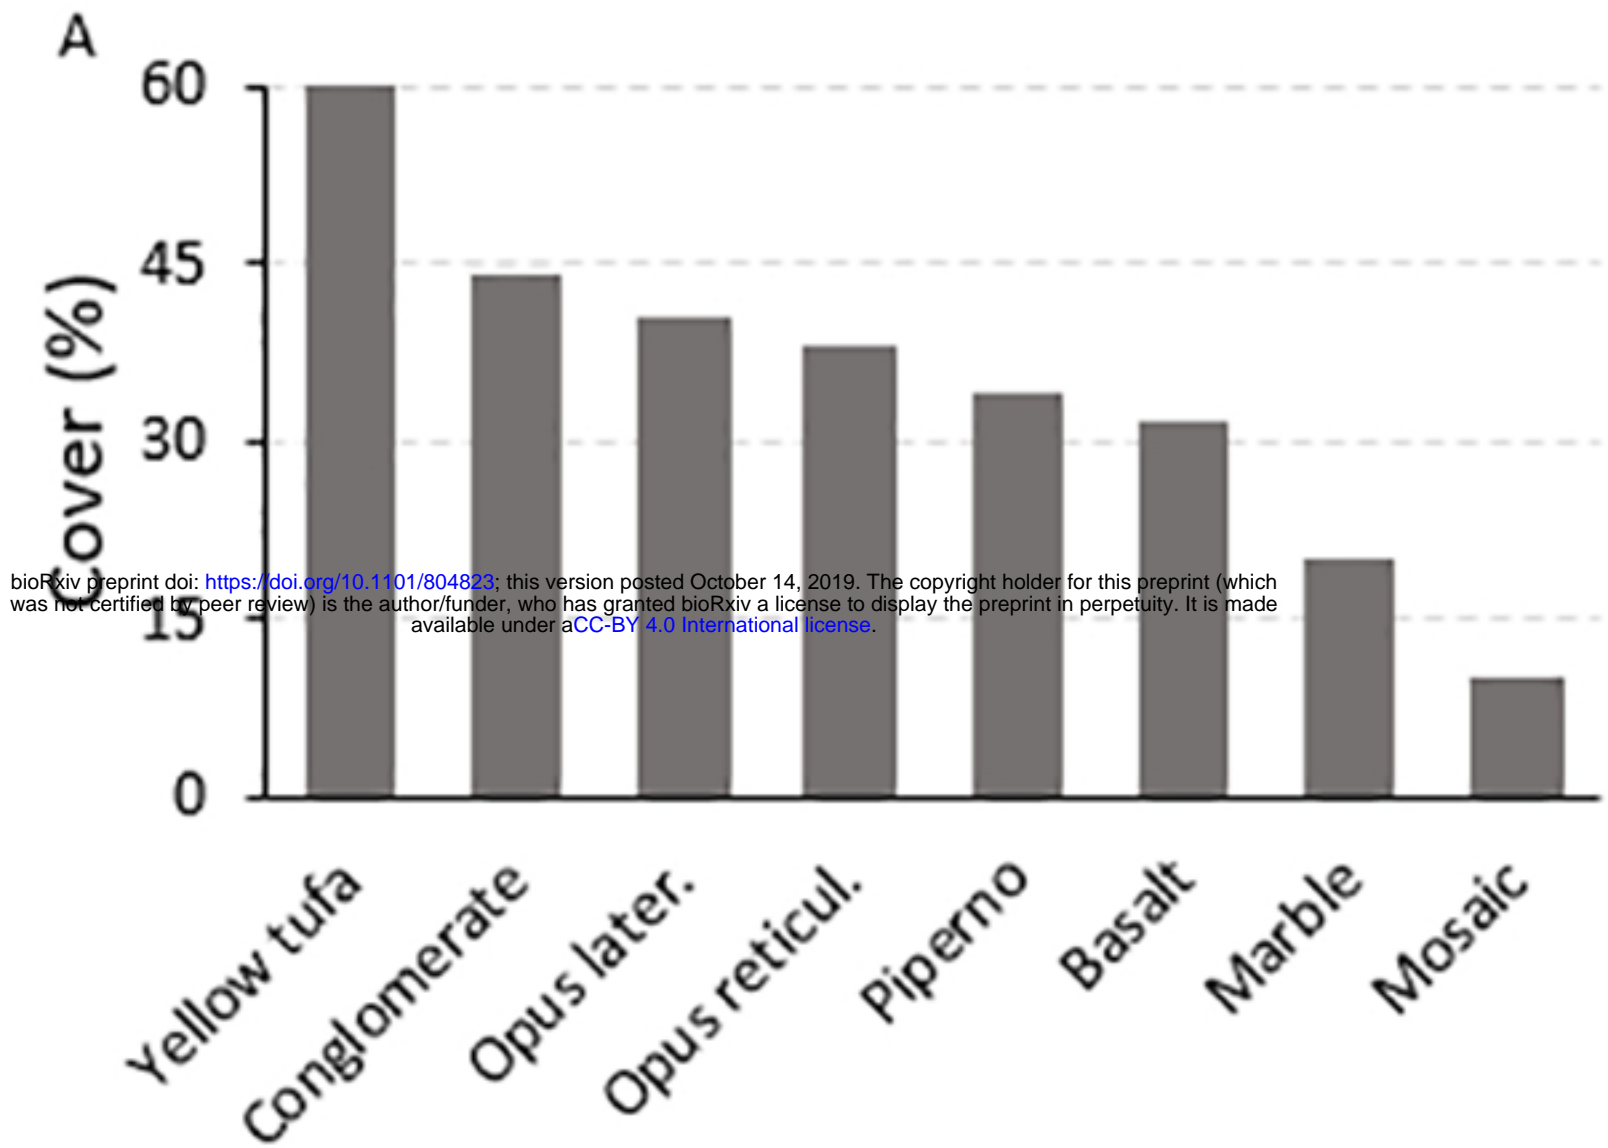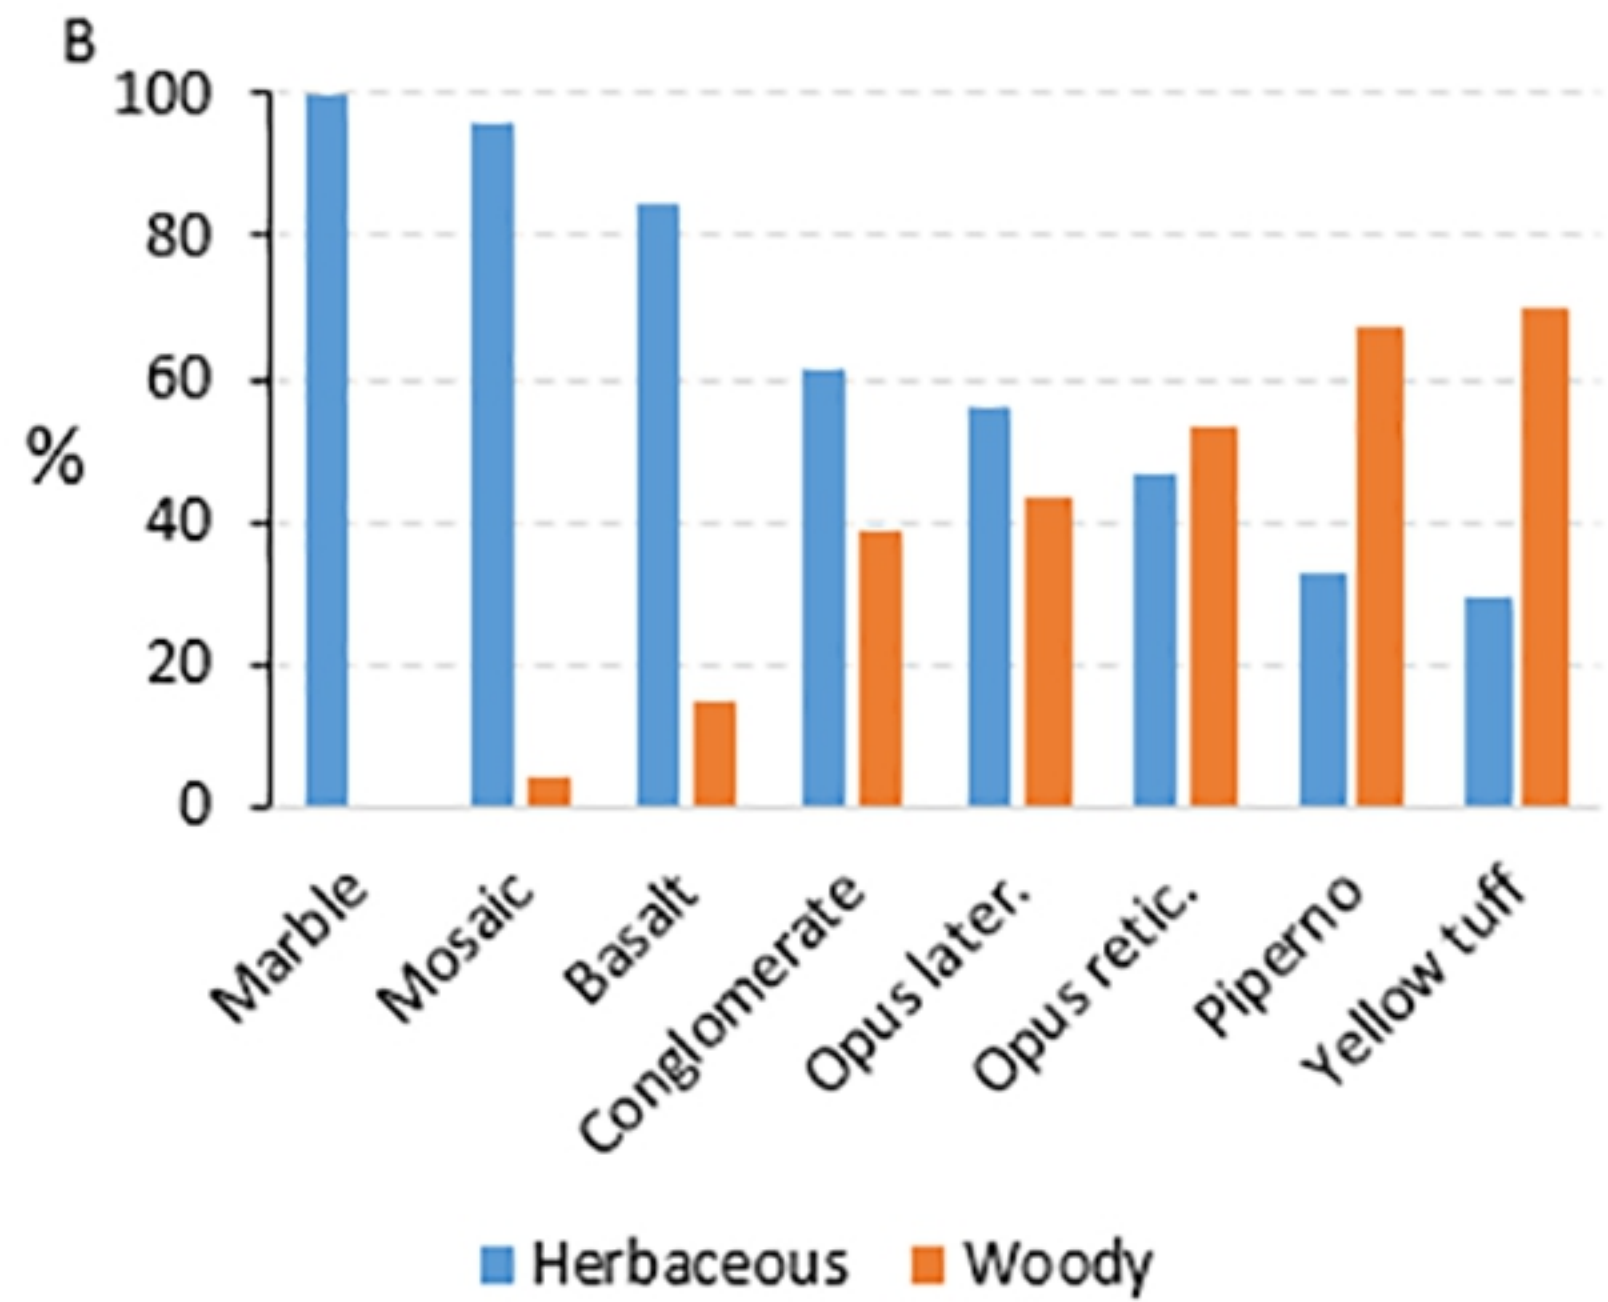

Figure

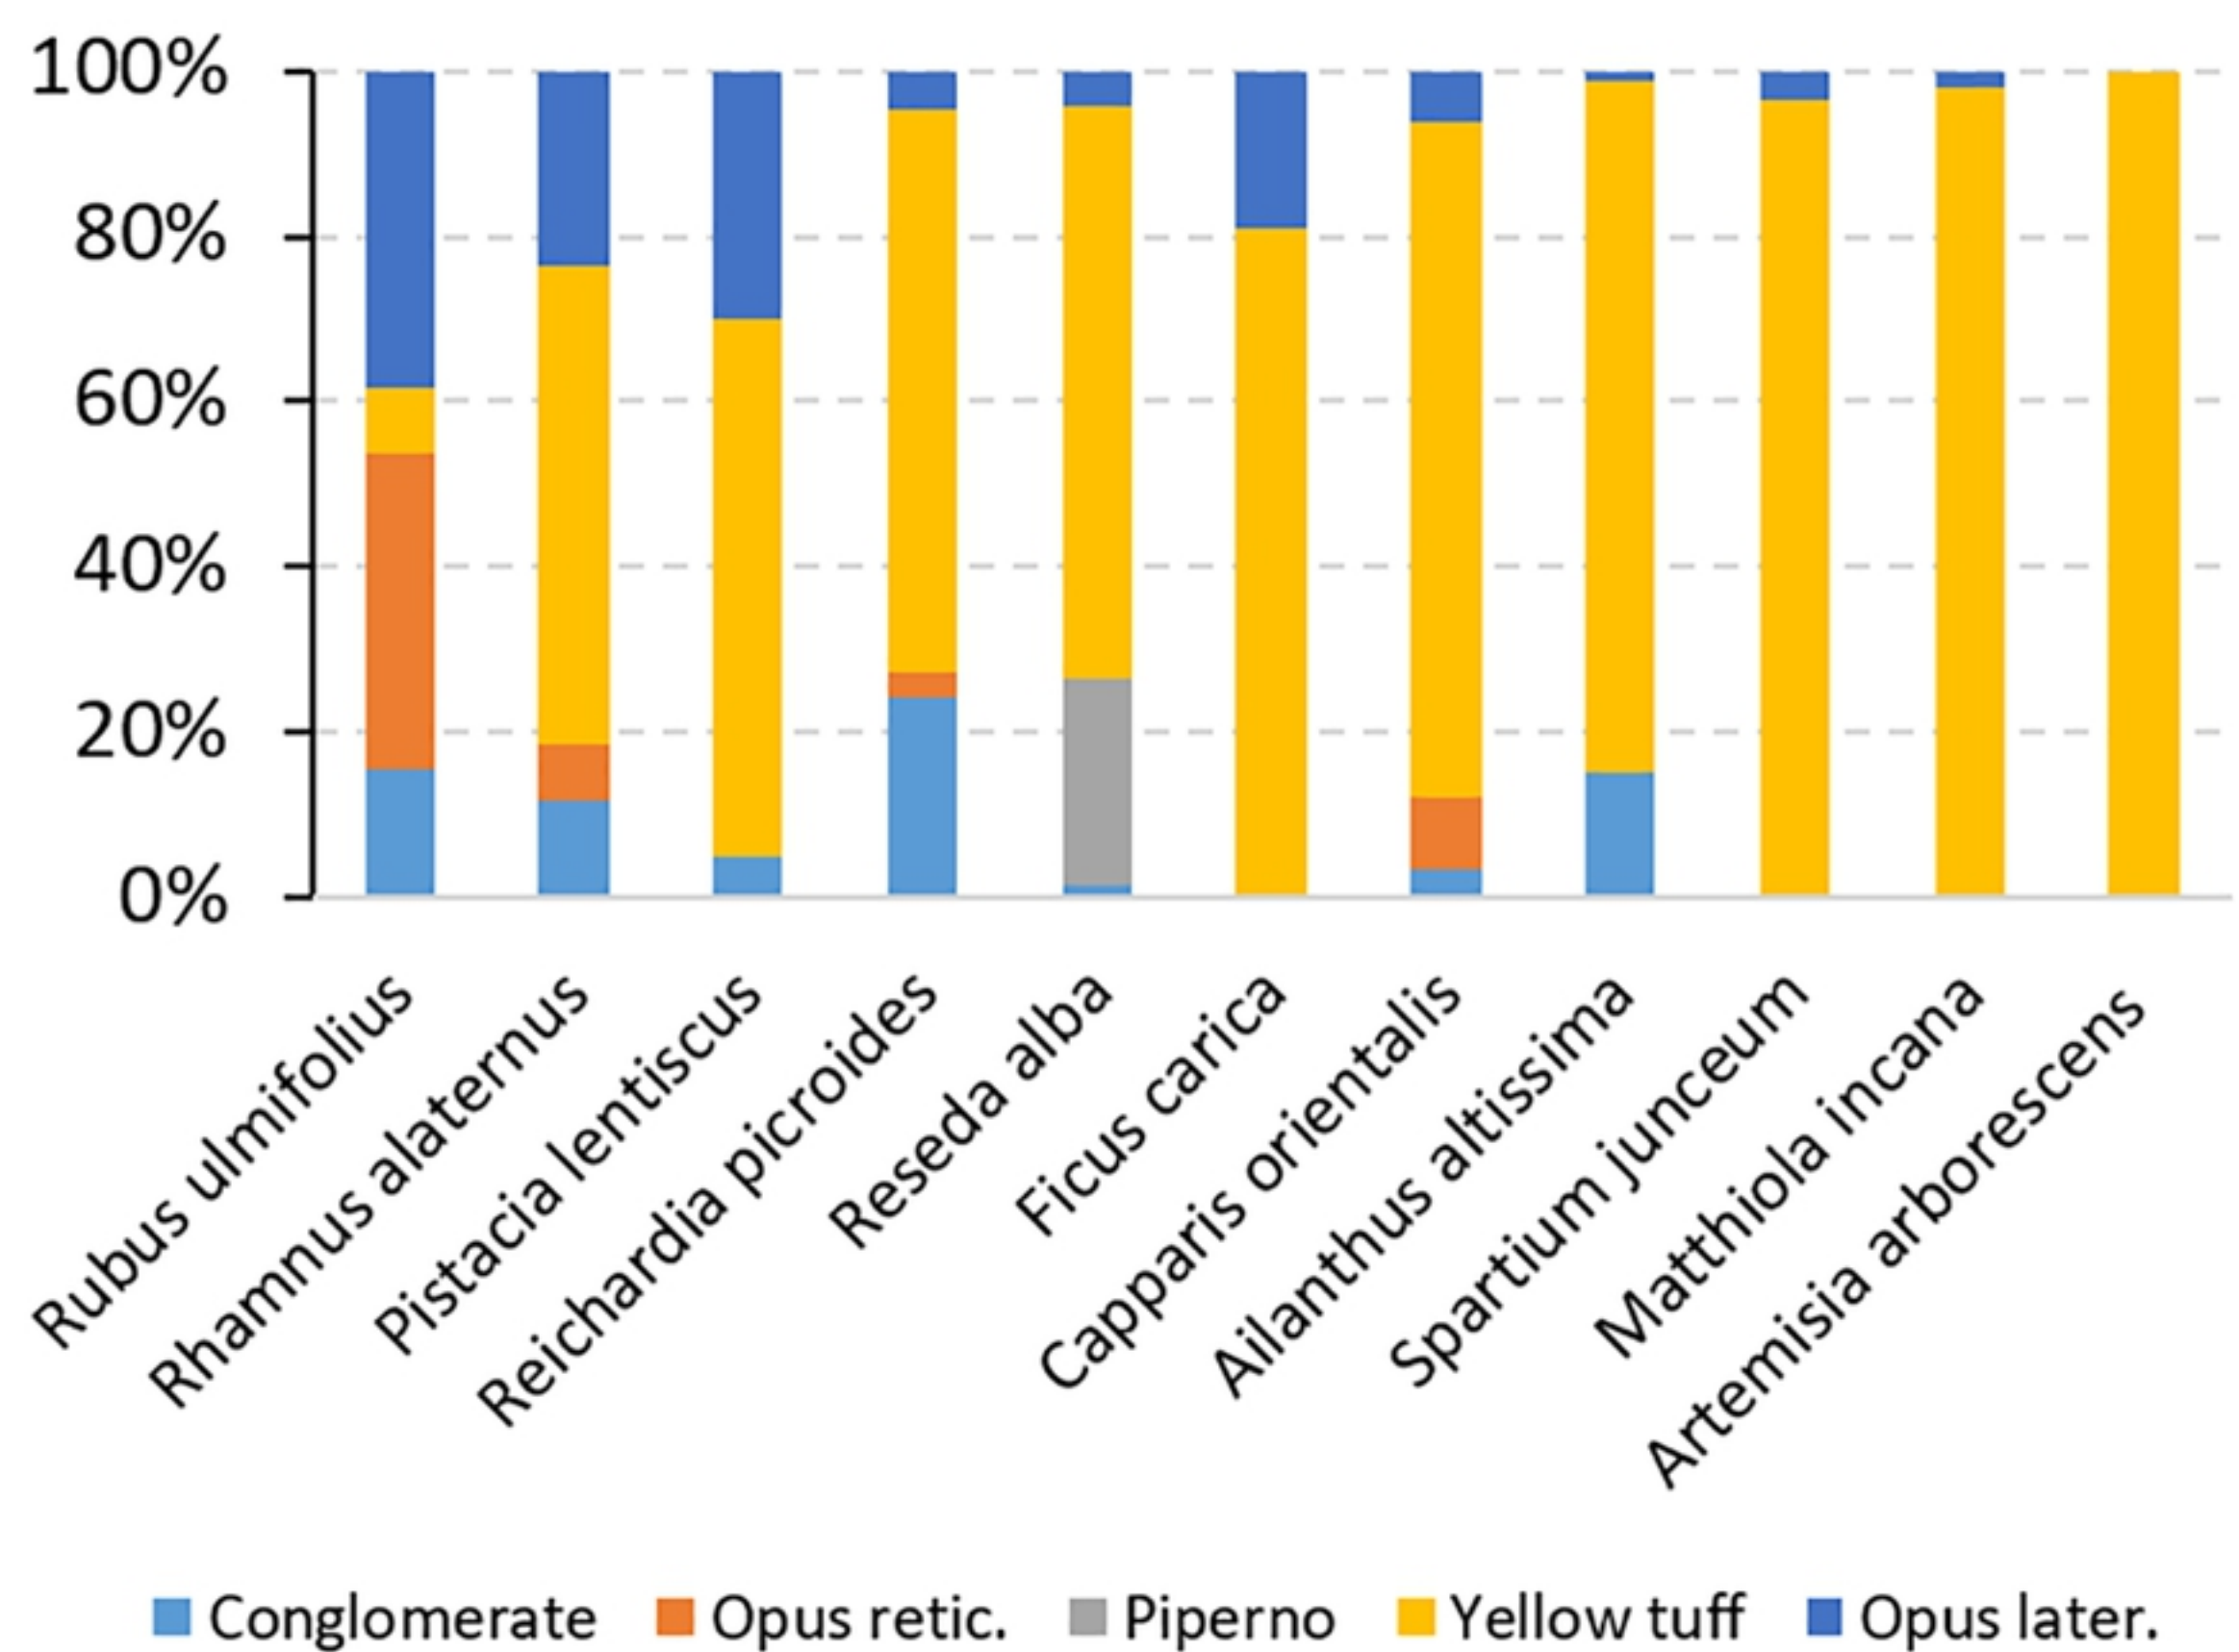

Figure



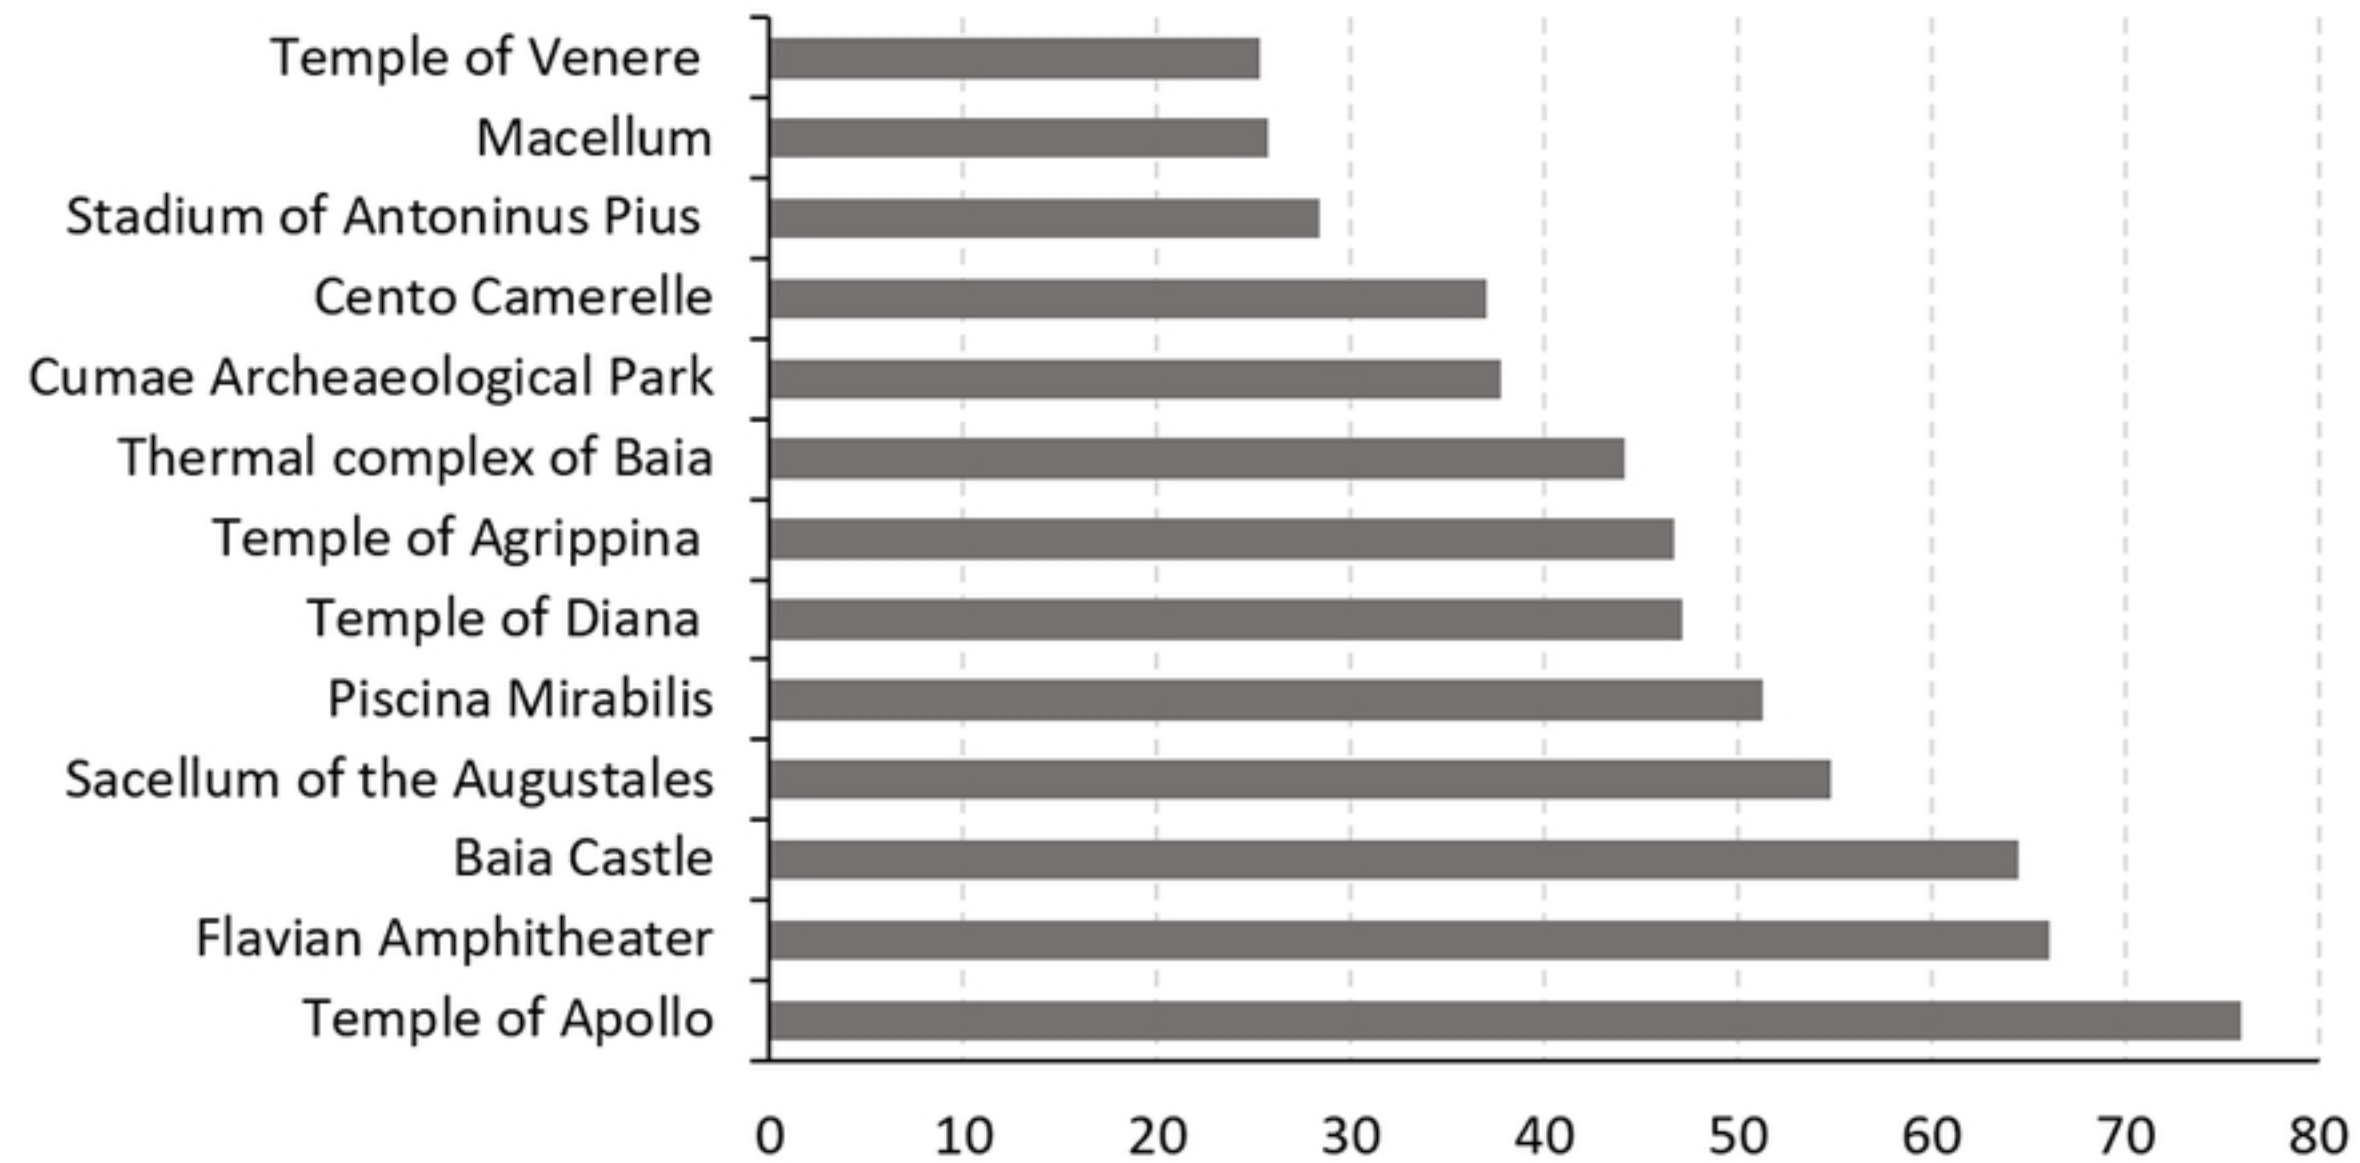

Figure
